# Supplementary material
Source: PubMed Central journal article supplement (PMC5637368)

Table S1.1 List and annotation 24 single-copy genes of the *Armillaria cepistipes* with SNPs used in the study

| Genes | SNPs     | Mean identity, % | FUNYBASE annotation*                                                                                                                                                                                                                                     | Sequences of nuclear DNA fragments with SNPs**                                                                                                                                                                                                                                                                                                                                                                                                                                                                                                                                                                                                                            |
|-------|----------|------------------|----------------------------------------------------------------------------------------------------------------------------------------------------------------------------------------------------------------------------------------------------------|---------------------------------------------------------------------------------------------------------------------------------------------------------------------------------------------------------------------------------------------------------------------------------------------------------------------------------------------------------------------------------------------------------------------------------------------------------------------------------------------------------------------------------------------------------------------------------------------------------------------------------------------------------------------------|
| FG487 | FG487_3  | 49.9             | Gamma subunit of coatomer a heptameric protein complex that together with Arf1p forms the COPI coat; involved in ER to Golgi transport of selective cargo; Sec21p                                                                                        | TCAATGAATCCCCATAAGCCCAAGAAAGTGYCGAGCGTTGCTAACACGGATAGTCTACCTGCTCTATGTCGGCGAGACCTT<br>TGGAACACAGGAGGCGACAACCCTGTTCTTTGGGACCACGAAGCTCTTCCAGCACAAAGATGTAAGCGGYG[A/G]CTTATTG<br>TGCAGAAATTTGGGCTGATWGTAGTGACAGAGTGCAYTGAGGCAAGCCGTCTATCTYGCTATCAAGGAGCTCGCGACAACYG<br>CCGAGGATGTWATCATGGTCACAAGCAGTATCATGAAGGACATG                                                                                                                                                                                                                                                                                                                                                            |
| FG524 | FG524_2  | 70.9             | Mitochondrial DNA-binding protein component of the mitochondrial nucleoid structure involved in mtDNA replication and segregation of mitochondrial genomes; member of the mitochondrial carrier protein family; Yhm2p                                    | TCGGTACGCATATCATTCTACGATGCTCAGGTACGAATTGCTGATCGATY[C/T]TGTAACCTGGCAGCATGGGATTGCTCG<br>TTTGACCGAAATTTTCATCCGGAGAGCCCGCGGTAAAGGGGAGAACGATTCTTTGAATGCTTTTCGAGAAAATTGCGGCCTCG<br>ACTGTTGGTGGAAACCCTGGCTACT                                                                                                                                                                                                                                                                                                                                                                                                                                                                    |
| FG529 | FG529_4  | 52.3             | Ubiquinol-cytochrome-c reductase a Rieske iron-sulfur protein of the mitochondrial cytochrome bc1 complex; transfers electrons from ubiquinol to cytochrome c1 during respiration; Rip1p                                                                 | CCCGGAGGGCAAGAACGTCATCATCAATGGCGTGGMAAGCCCGTATTCATCAGGCATCGRACRCAGGCAGAAATTGAGG<br>AGGCCAGGAGGGAAGACTGGAAGAG[C/T]TTTAGGGACCCCGAGAGCGACGAGAGCCGTGCAAAAAGCCCGAATGGCTG<br>GTATGTTGGGCGTTTGCACCCATCTGGGTT                                                                                                                                                                                                                                                                                                                                                                                                                                                                     |
|       | FG529_5  |                  |                                                                                                                                                                                                                                                          | CCCGGAGGGCAAGAACGTCATCATCAATGGCGTGGMAAGCCCGTATTCATCAGGCATCGRACRCAGGCAGAAATTGAGG<br>AGGCCAGGAGGGAAGACTGGAAGAGYTTTAGGGACCCCGAGAGCGACGAGAGCCGTGCAAAAAGCCCGAATGGCTGGT[C/T]<br>ATGTTGGGCGTTTGCACCCATCTGGGTT                                                                                                                                                                                                                                                                                                                                                                                                                                                                    |
| FG652 | FG652_11 | 59.5             | Delta-aminolevulinatase a homo-octameric enzyme catalyzes the conversion of delta-aminolevulinic acid to porphobilinogen the second step in the heme biosynthetic pathway; localizes to both the cytoplasm and nucleus; Hem2p                            | TTTATACGACCGTCCATCATGTCRCTGGGCGCTACRCAGTGGGCCCCRGCTTTTCGCGTAATTGACGGCAACCTCGGCRATA<br>CGRTCCACAGAAGGARCRRTTGTGATAGTACCGTCGTCGTGGAGYAGRCCACAGTGACCRRTGGCTTGTGTACTCGCATAGA<br>CAGAC[A/G]TCGCAGGCKATGTAGAGAGCGGGGAACAGTTCGCGAAGTTTCTTGATGGCAAGAATGACGGGTCCAGCGGGA<br>TCRTCTGCTGGCGTTCCCTTCCGTCCTGCAGTRRCCATGAGAGCTGTTATATGYGCGAATAAAYAYACGCACCTTRATGC<br>ATTCATCGGTACTCCGAAGAGAATCACRCTCTGTAGACCTTTCTTGACCAATGGACCCAGGAACCTCGTCCAATTTGTTCCACC<br>CCCCATCGCTTCTGKCCCGRAGACTYTCAATAACCTCGCTCGCRTCCGGGTCTCCGTTATRAARATGGGATACATGAGC<br>ATGGACTTCGT                                                                                                                              |
|       | FG652_20 |                  |                                                                                                                                                                                                                                                          | TTTATACGACCGTCCATCATGTCRCTGGGCGCTACRCAGTGGGCCCCRGCTTTTCGCGTAATTGACGGCAACCTCGGCRATA<br>CGRTCCACAGAAGGARCRRTTGTGATAGTACCGTCGTCGTGGAGYAGRCCACAGTGACCRRTGGCTTGTGTACTCGCATAGA<br>CAGACRTCGCAGGCKATGTAGAGAGCGGGGAACAGTTCGCGAAGTTTCTTGATGGCAAGAATGACGGGTCCAGCGGGATC<br>RTCTGCTGGCGTTCCCTTCCGTCCTGCAGTRRCCATGAGAGCTGTTATATGYGCGAATAAAYAYACGCACCTTRATGCAT<br>TTCATCGGTACTCCGAAGAGAATCAC[A/G]CTCTGTAGACCTTTCTTGACCAATGGACCCAGGAACCTCGTCCAATTTGTTCCACC<br>CCCCATCGCTTCTGKCCCGRAGACTYTCAATAACCTCGCTCGCRTCCGGGTCTCCGTTATRAARATGGGATACATGAG<br>CATGGACTTCGT                                                                                                                             |
| FG686 | FG686_3  | 53.4             | Imidazole glycerol phosphate synthase glutamine amidotransferase                                                                                                                                                                                         | ACCGTGCCTGRTACCACCARGCCTTTCCCTYTCCTCTATCACTTTGGARTCAGGGCGTCCCTCGAATTACCTCTCCCTTGT<br>ATGGGCCGTCATA[C/T]GTCTCGGGGTCCACATACACCCGTCTAGGRTCAACAGACACGACGACCCGCTGTCTTCCATACGC<br>ATAYGCAATCGTCTCGATCGCACTCGTCCCATCGCCCTCGTTCTTTTCCGACGCCAGCATCTTCTCCACAGCCAACACTGCT<br>TCGCTGCCAATACTGACCTTGTGCGGCGCCRGCGCGGAAATAGGYGCCCGCGACTTCRAGYCGGGRTGCTTGGTGCCGTC<br>WGGRTCGAYGGTGTCTTTATCCACCGCCGATAGTGAGAGGGACGAAGACGCGTTCTGCCGCGGTACGGACGACTGCGA<br>TCATTGGCTGATCTCGGAGGGGGAGTGCCGGAAGGAKGTGATGTTGAGCA                                                                                                                                                                                |
| FG691 | FG691_2  | 73.6             | Tetradecameric mitochondrial chaperonin required for ATP-dependent folding of precursor polypeptides and complex assembly; prevents aggregation and mediates protein refolding after heat shock; role in mtDNA transmission; similarity to groEL; Hsp60p | >FG691_2<br>TCGTAGCGGTCCTTCTTCTCTCCAATTTCGACCTCGCTGCTGCCGCCGACTTTAATGACAGCAACACCACCGCTCAGCTTCG<br>CGAGACGCTCCTGCAGACGTGTACGATCATAGTCGCTCGTACCCTTGTCAATCAAACCTCKAATCTGCTCGCACC<br>CCTGGATCGCCGACCCTCGCCTTCGCCATTGAGAACGATCGTGTCTCTTGGTACTGTCAAGCTACCCGAGCTGCCGA<br>GCATCTCCCGGGATGCATTCTCGAGCTTGTCAACGTCATTGCTGAACACGGTACCACC[A/T]GTAAGAACTGCCAAATC<br>GCCAAGAATGTTCTTGGCGTTGTCTCCGAAGCCAGGAGCTTTGACCGCAACAACCTGCAATTGGCCGCGGAGCTTGTGAG<br>AATAACAAGCAGCCAAAGCCTCGCCGTCAACATCTTCAGCGACAATGACCAATGGCCGTCTGTCCCAGCAGCAATCTCCAG<br>AGACGGCAGGATATCAGCAAGCACACTGATCTTGCCTCGCTGAGTAAGATCAACGTTTCTCCATCTCGCATTCTGACCC<br>TTGACRTCCGTGATGAAATACGGACTGATGAATCCCCGGTCAAGCGCATGCCYTC |

| Genes | SNPs               | Mean identity, % | FUNYBASE annotation*                                                                                                                                                                                                                        | Sequences of nuclear DNA fragments with SNPs**                                                                                                                                                                                                                                                                                                                                                                                                                                                                                                                                                                                                                                                                                                                                                                                                                                |
|-------|--------------------|------------------|---------------------------------------------------------------------------------------------------------------------------------------------------------------------------------------------------------------------------------------------|-------------------------------------------------------------------------------------------------------------------------------------------------------------------------------------------------------------------------------------------------------------------------------------------------------------------------------------------------------------------------------------------------------------------------------------------------------------------------------------------------------------------------------------------------------------------------------------------------------------------------------------------------------------------------------------------------------------------------------------------------------------------------------------------------------------------------------------------------------------------------------|
| FG698 | FG698_1            | 60.2             | Subunit of heteropentameric Replication factor C RF-C which is a DNA binding protein and ATPase that acts as a clamp loader of the proliferating cell nuclear antigen PCNA processivity factor for DNA polymerases delta and epsilon; Rfc5p | CAGGTTGGACATGTATTTTTCCATTGTTTCGACGCAGGGCCGCTTGAGCATCGCGTGACAAAGAATCGGCCTCGTTGATAAAT<br>ACCACTGATATTAAGC[A/G]CATGAAGACGTGGGACAACGGTGGCATGAAARTGGTCCTCACCTTTAAATCTTTGTTTAGCGT<br>TTAGATCAACCTGCTGTGTCTGCGCAATTTCTTTGAGCAATTTCTGGATAACCACTCTGTTCATAGGACCCCGCTTCACTGCAT<br>AAGAATTGTCCCATTATAACATATATCATTGCCAAAAACGACAACCATACTCGGCCTTATTTTCGATGTGGAAGTTGCTTTGA<br>ACGAGGTTCACTTCGACTTTTCGTCTGGAAGGTGTTAGGAACACGCGTTGGTTCGATTTTTAGCTGTAAAAAGCTCTAAGTC<br>ATCAATTGGATAACATGGCATGACACACACCTTCTCCACCCAGGTCCAAACAACCTGCCTCAAAGTACACGTTATACGCGTC<br>TTCTTCCAGCTCCAGATGGGCCGTARAACAGCATGTGGGGAAAGTC                                                                                                                                                                                                                                                                                      |
| FG716 | FG716_4            | 52.4             | hypothetical protein; Yor356wp                                                                                                                                                                                                              | GTGTTGCTGGGGAAGACGGAAGTCAGAATGACGGACGATACAGACCAGGGGAAGTCSTCCACACTCTTGGATGGCCCATT<br>GAGCCACAGACATATGGCGGTGGTTGGGTGTATCACATGGATGGYGGACTAGTAAGTTTGGGACTGGTCATCGGGGCGGA<br>TTGRAAAAATCCGTATAGAGAACCCTATCGGGATTTCCAGATGATGAAGCACCACCCTTACTTAAGGAAGCTTCT[G/T]ACGG<br>CGTCCGATTCATCGTTCACACCAACCCGTGTTGCATACGGAGCTCGCGTGTGACGGAAGGAGGCCTGCAATCTATCCCC<br>TTCTTCATTTCCCCGGCGGTGCACTCATTGTTGCTCCGC                                                                                                                                                                                                                                                                                                                                                                                                                                                                                    |
| FG730 | FG730_11           | 43.7             | Protein that forms a heterotrimeric complex with Erp1 Erp2p and Emp24 member of the p24 family involved in endoplasmic reticulum to Golgi transport; Erv25p                                                                                 | AGAAATTGTTGATTCAAGCCCGCAGAAGAAYGTCTACCTCAGTAAGAGGAAYGTCAATGCAGAGACGAGGYTGGCTATAAC<br>GACACACGCYAGGGAGARGTRGGAGTATGTTTCAAGAATCATCTTGACCCGGGTATGTTTCTACTTTGTTCTTTRCCGAG<br>CATTGTCTYAYGYA[C/T]GGGTAGATGTACGGTCAGAGACGGCAAAAACGGCTCGCATAATCGACTTGGAYGTC                                                                                                                                                                                                                                                                                                                                                                                                                                                                                                                                                                                                                          |
| FG735 | FG735_16           | 38.7             | Subunit of the 26S proteasome substrate of the N-acetyltransferase Nat1p; Rpn2p                                                                                                                                                             | GGATACCARTACCAGAACTGACAAAACATGACCATGCCAACAATYGCCTTGGTATTCCGGCTTCTGCACGACTCAGYAAAC<br>TGATAGTAACGTTCTACCACCAGCGTCRATGAGTCCCTGGCCAATAGCAGCACCAAATCGTGCGACAGGRTCCCTCGTGCT<br>TGTCAGAAACCACTTTSGTRTACAGCGAACGRGTGGASGCAAGAGATGSCGACGACGCATCCGATTGTTCTACAAGGATCAT<br>GCCYAGAGCGATAAACGCSCCTTGTGCAACGAAATCTACGCTATCYCGTGTTCATAGGTTCCAAAATCTCGACAGCGTCTAA<br>TAATTGTAAGTCAACTCATGTTTCAGTGAGATCAAATRAGATACTGACTTGAAGCCCRGTTTCTGCACAAGCAATTCCCAACGC<br>GAGAGTGGCACCACAACGCACGTGGGGGTTGTAGCTTT[C/A]CTCAATAGTTGCACGATTTCGAGGCACCTGGCCGGGGTT<br>TTTGAATAAAAAGGAAAGCRAGGGATGTTACAGCTGCTCTTCCGAACATCGTCGGAGACATCTGACACGGCGATGTGAAGTARA<br>CGGCGAACTGCATCATTGTTCCCGTTCAGCGTAGGCAAGGGCCAAAGTGTATACACCTCCGTAACGAAGAATGGGRTCC<br>TACAAGACRGTAAGKAGSGGTTTAGGCAGAAGAAAACGGGGCTCACTTTTCCGCYAGGAGCAATTTTRATTGACTATCAGC<br>TTCTTCTGACGACCATAATAAACAAGGCGACGCCGATTGCGAGACCACGAATAATCTTCTCRTGCTGAGTCTC |
| FG747 | FG747_1<br>FG747_2 | 56.6             | Glutamine-dependent NAD+ synthetase essential for the formation of NAD+ from nicotinic acid adenine dinucleotide; Qns1p                                                                                                                     | ATGCGATGGCGATCGACTGTATTA[C/T]GACGGATGCGCTATGATTGCTGTCAACGGCAGGATTGTAGCCCAGGGATCCCAG<br>TTCTCTTTGAATGATGTCGAAGTYATAACTGCAACAATTGATATCGAGGATGTCCGCAGCCACCGTGCAATCAGCAGTCGAA<br>GCATGCAGGCGGCCTCCGCGGAAAGATATCACCGTATCGAAGTTCCTTCTCGTTGTGACGCGGAAAATTTGAGGAGGTGA<br>GGGACGAAGATATGGTGGGRTTTTTATCATCCCGCCCTTACGAAGTGAAGTACCACCGACCMGAAGAGGAGATCGCGTRA<br>GTACTGTTTCGTTCAAACCATYCTAAAGCTCAGGTTTTCAAAGTTTGGGACCTGCR<br>ATGCGATGGCGATCGACTGTATTAYGACGGATGCGCTATGATTGCTGTCAACGGCAGGATTGTAGCCCAGGGATCCCAGTT<br>CTCTTTGAATGATGTCGAAGT[C/T]ATAACTGCAACAATTGATATCGAGGATGTCCGCAGCCACCGTGCAATCAGCAGTCGAA<br>GCATGCAGGCGGCCTCCGCGGAAAGATATCACCGTATCGAAGTTCCTTCTCGTTGTGACGCGGAAAATTTGAGGAGGTGA<br>GGGACGAAGATATGGTGGGRTTTTTATCATCCCGCCCTTACGAAGTGAAGTACCACCGACCMGAAGAGGAGATCGCGTRA<br>GTACTGTTTCGTTCAAACCATYCTAAAGCTCAGGTTTTCAAAGTTTGGGACCTGCR                                                |
| FG756 | FG756_2            | 50.5             | Ferrochelatase a mitochondrial inner membrane protein catalyzes the insertion of ferrous iron into protoporphyrin IX the eighth and final step in the heme biosynthetic pathway; Yfh1p mediates the use of iron by Hem15p; Hem15p           | GGCTTGCTGGCGCATGAAGTTACTGCTCCRAGYATGAGAACRACGGCAAAGGAAAGAGCCRAAGAAGGGGTACAGACCTC<br>AGAACACGAGCATCCGAAGTCAGACCAGCGATAGCGATACCAACATGGTCATCTATTCCGGAACATCTTCTGTTGGTATGAAG<br>CCAGTTCRCCKGCGGAACGCTACAAGGGG[C/T]CAGTCAATAACCCAKTTGYRRATATTCRTTGKWAACAAGAACCTTGAGG<br>GCCAGTAAGACTGAGTGKGTCTTTGAACGCAAGCCGACRGCCGACAGGCCTTGCTTACGGCTTCAAGGGCATATTCGACC<br>TGGTGAAGRCGACCTTGRGGCGAGAAAACAGTGTTTRCCGAGTCGTATGT                                                                                                                                                                                                                                                                                                                                                                                                                                                                      |
| FG762 | FG762_7            |                  | 20S proteasome alpha-type subunit; Pre5p                                                                                                                                                                                                    | GGCTTGCTGGCGCATGAAGTTACTGCTCCRAGYATGAGAACRACGGCAAAGGAAAGAGCCRAAGAAGGGGTACAGACCTC<br>AGAACACGAGCATCCGAAGTCAGACCAGCGATAGCGATACCAACATGGTCATCTATTCCGGAACATCTTCTGTTGGTATGAAG<br>CCAGTTCRCCKGCGGAACGCTACAAGGGGYCAGTCAATAACCCAKTTGYRRATATTCRTTGKWAACAAGAACCTTGAGGGC<br>CAGTAAGACTGAGTGKGTCTTTGAACGCAAGCCGACRGCCGACAGGCCTTGCTTACGGCTTCAAGGGCATATTCGACCTG<br>GTGAAGRCGACCTTGRGGCGAGAAAACAGTGTTTRCCGAGTCGTATGT                                                                                                                                                                                                                                                                                                                                                                                                                                                                          |



| Genes | SNPs     | Mean identity, % | FUNYBASE annotation*                                                                                                                                                                                                                  | Sequences of nuclear DNA fragments with SNPs**                                                                                                                                                                                                                                                                                                                                                                                                                                                                                                                                                                                                                                                                                                                                                                            |
|-------|----------|------------------|---------------------------------------------------------------------------------------------------------------------------------------------------------------------------------------------------------------------------------------|---------------------------------------------------------------------------------------------------------------------------------------------------------------------------------------------------------------------------------------------------------------------------------------------------------------------------------------------------------------------------------------------------------------------------------------------------------------------------------------------------------------------------------------------------------------------------------------------------------------------------------------------------------------------------------------------------------------------------------------------------------------------------------------------------------------------------|
| MS413 | MS413_1  | 58               | Component of the holoenzyme form of RNA polymerase transcription factor TFIIF has DNA-dependent ATPase/helicase activity and is required with Rad3p for unwinding promoter DNA; involved in DNA repair; homolog of human ERCC3; Ssl2p | GATGGAGTTTTTGACCTCTCGAGAATGGGGCTTCATGCTATTGGATGAAGTACATGTTGTACCCGCTGCAATGTTCCGTCGG<br>GTTGTCGGAACGATCAAAGCGCACTCCAACTTGGT[C/T]TGACCGGTACGCTAATTCTTTCCCTTTCACTTTCTTTCGAAGGA<br>ACCATGAAGCTCATGTTCTGACTTGTTCAGCTACCCTTGTCCGTGAAGATGACAAAATAGCGGACCTGAACTAYATGATCGG<br>GCCCAAACGTACGAAGCGAATTGGATGTCAGTTGCTCACCATATGTCCATCACTGTAGTTAAATTGTTAATGACCGCTTTG<br>CCTTTCTAGGGATCTTGCTGCCAAGGGACATATTGCAAATGTGCAGGTATTATCAACCTTACCTTAATTTTTGATATCAAGA<br>TCGCTGAGTTCGGCGCATAGTGTGCGGAGGTATGGTGTCCAATGACACCCGAATTCTATCGTGAATACCTTCGGGAGCAAT<br>CTAGAAAACGCATGCTTCTATAYTGCATGA                                                                                                                                                                                                                                                        |
|       | MS413_2  |                  |                                                                                                                                                                                                                                       | GATGGAGTTTTTGACCTCTCGAGAATGGGGCTTCATGCTATTGGATGAAGTACATGTTGTACCCGCTGCAATGTTCCGTCGG<br>GTTGTCGGAACGATCAAAGCGCACTCCAACTTGGTYTGACCGGTACGCTAATTCTTTCCCTTTCACTTTCTTTCGAAGGAAC<br>CATGAAGCTCATGTTCTGACTTGTTCAGCTACCCTTGTCCGTGAAGATGACAAAATAGCGGACCTGAACTA[C/T]ATGATCGG<br>GCCCAAACGTACGAAGCGAATTGGATGTCAGTTGCTCACCATATGTCCATCACTGTAGTTAAATTGTTAATGACCGCTTTG<br>CCTTTCTAGGGATCTTGCTGCCAAGGGACATATTGCAAATGTGCAGGTATTATCAACCTTACCTTAATTTTTGATATCAAGA<br>TCGCTGAGTTCGGCGCATAGTGTGCGGAGGTATGGTGTCCAATGACACCCGAATTCTATCGTGAATACCTTCGGGAGCAAT<br>CTAGAAAACGCATGCTTCTATAYTGCATGA                                                                                                                                                                                                                                                        |
| MS428 | MS428_4  | 55               | Hydrophilic protein that acts in conjunction with SNARE proteins in targeting and fusion of ER to Golgi transport vesicles; component of the TRAPP transport protein particle complex; Bet3p                                          | TTCGGTACACGGCTGATAGAAGATTTTCTGGCGAARAGYAGTTTGGGGCGGTGTTTTCAGATTTTCGGGAGGTTGGGGAGGTC<br>GTTGCAAAGGTGCGTAGACTGCGCTGTGAATGYTGAGGGGGTTCGTCGCCGATCACTTCTCTCTCCTG[C/T]TAYTAGGTGCG<br>GCTTCAAGTCGTTTCTCAACATTTTACCATCCGTCACACATGGCACTGCTGCCCCCCATCGTCACCGGGGGCGTCCGAATA<br>GCGTGGGCTCYGTACCAGGATCATCGGGAGCGTATTTTACACTRGCTCTGGACGAGAACCCTCTGGCCGAGTTCGTTGARC<br>TCCCAGAAGAAGTCTCGAAGGCGGTCTCTGGTTTTCAGCAACGTTTTATGA                                                                                                                                                                                                                                                                                                                                                                                                              |
|       | MS428_6  |                  |                                                                                                                                                                                                                                       | TTCGGTACACGGCTGATAGAAGATTTTCTGGCGAARAGYAGTTTGGGGCGGTGTTTTCAGATTTTCGGGAGGTTGGGGAGGTC<br>GTTGCAAAGGTGCGTAGACTGCGCTGTGAATGYTGAGGGGGTTCGTCGCCGATCACTTCTCTCTCCTGYTAYTAGGTGCGC<br>TTCAAGTCGTTTCTCAACATTTTACCATCCGTCACACATGGCACTGCTGCCCCCCATCGTCACCGGGGGCGTCCGAATAGC<br>GTGGGCTC[C/T]GTACCAGGATCATCGGGAGCGTATTTTACACTRGCTCTGGACGAGAACCCTCTGGCCGAGTTCGTTGARC<br>TCCCAGAAGAAGTCTCGAAGGCGGTCTCTGGTTTTCAGCAACGTTTTATGA                                                                                                                                                                                                                                                                                                                                                                                                               |
| MS441 | MS441_4  | 59.9             | Bifunctional chorismate synthase and flavin reductase catalyzes the conversion of 5-enolpyruvylshikimate 3-phosphate EPSP to form chorismate which is a precursor to aromatic amino acids; Aro2p                                      | ATGCTYTCCATYCCGGCYACTAAGGCTTTTCCAAATCGGGTCTGTTTTAAGGGGACAGAGGTACCTGGAAGCAAGCATAAC<br>GATCCTTTTTGT[A/G]AAGCGTGATGACGGGCGACTCGGAACAAAGTCTAACTGGAGTGGCGGTGTGCAAGGAGGCATCACT<br>AATGGGGAGGATATTTAYTTCCGGTTAGTTCTTGMTRCTTTSACTTCTTTTRGAYWCTGATGGTTCGGCTTCTAGGATCGGATT<br>CAAGTCGCCAGCGACCATTTTCRCAGGCTCAAGAC                                                                                                                                                                                                                                                                                                                                                                                                                                                                                                                   |
| MS452 | MS454_7  | 39.3             | Essential nucleolar protein of unknown function; contains WD repeats interacts with Mpp10p and Bfr2p and has homology to Spb1p; Enp2p                                                                                                 | CCGAGTTGCGGAACGTAATAAGTRCCCATTTGAATGCCTTCGTTGGCAGTCATTAGAAGCCCACTCCCGGGAACGTGGTGA<br>ACGTGAYTGAGGTCAGTGGCAGGTGTGATAGAAACGAAGTTGGTTGAGGGCTAGAAGTAAATCATTACCTTATGGTTCGAAGT<br>GTGCACGGCGGGTACAACATAACCGTATTTTCGATCCCAAATTTTATCACCTTCTTGTGTCAGCACTGAGRATCATSCCGTCTCC<br>AGCCATACGGCTACCACCCTCGATCCATAGGAGACTTTTACCAGGAAAGTCCGTAACCTTGGTCTTTCRTAGCAAACGGCCR<br>CGCCGCTCGAATATCATA[A/G]CAGTGAATGGCCCGTTCGATGTTCCACCGCGTAAGTAAGCCCATCATCACGAGATGCC<br>AACGCCGTCACTAACAACATCTGGCGTCGAAAGCCTGCTCGTTCGATTTTCGAGGACCCCTACGCAAGATCTCGATCGG<br>GGATCCCAGAAATGAACCGAACCGTTGCCGTCTATCCCAAAGCCCCACAGTTGATGCGCTGGGTTGACATCAACAACGTTT<br>ACTCCAGCGATTTCTTTCGTCAGCCTSCAGGACCAAGGGAGTCATAAATCGACCTTGTATGATTGAGGCGATATATCTCAT<br>TACCGGAGGCGGAAAAYAGAGCGTCACACGAAGGGAAATGATAGGCAAGTGAACGTCCAAACCGCGGTATTCGTGTCCGG<br>TAATGGAAACCGCCTTGTGTGTGA |
| MS481 | MS481_16 | 36.1             | Essential serine kinase involved in the processing of the 20S pre-rRNA into mature 18S rRNA; has similarity to Rio1p; Rio2p                                                                                                           | TGCGCTGTGCTGACCATYTGAGGGAAATCRATRACGACAGGCTCCCCAGTGTCTCGCCGATCAGAATGTTGAACTCATTAA<br>AGTCTCCATGAATYAACCCSGCGGAGCAAATCGCACRATRATGTCCATCAAGGTTGAATAAAGCTTYCCTGGWGATGCAA<br>CCTCTGATATTTGTCGYCTTTAGAGCAGGTTAATRAGAAYATTGTAGCRTGCGTTAATTGAKAAACCTCACAAGGGATAWGC<br>ATCAATGAATTCATCAGAATACAGTGTGCTGTTGATCGATAGGTTGGAACAGGAAAATCGTGTTCGTGAAGGACCTGA<br>AACAT[C/T]RTTGGTTACAGAAGACGTTTTTACGATGAWTACTTACCTGCATGAAAGCCATTCTTTTTGAGCAGCTAAGCGAG<br>ACATGTACATCCACG                                                                                                                                                                                                                                                                                                                                                                  |

\* Putative single-copy orthologs of 21 fungal species used to compare identity: *Ashbya gossypii*, *Aspergillus fumigatus*, *Aspergillus nidulans*, *Candida glabrata*, *Candida lusitanae*, *Coccidioides immitis*, *Cryptococcus neoformans*, *Debaryomyces hansenii*, *Fusarium graminearum*, *Kluyveromyces lactis*, *Magnaporthe grisea*, *Neurospora crassa*, *Phanerochaete chrysosporium*, *Saccharomyces bayanus*, *Saccharomyces cerevisiae*, *Saccharomyces paradoxus*, *Schizosaccharomyces pombe*, *Sclerotinia sclerotiorum*, *Trichoderma reesei*, *Ustilago maydis*, *Yarrowia lipolytica* (Mathey et al. 2008).

\*\* SNPs selected for genotyping are marked with red color and square brackets





| Study                   | Loci  | Repeats | Primer sequences (5'-3')                                        | Multiplex | #Scaffold * | Start position, bp | Length of the fragment, bp | Total length of scaffold, bp | Genomic fragments with the SSRs                                                                                                                                                                                                                                                                                                                                                                                                                                                                               |
|-------------------------|-------|---------|-----------------------------------------------------------------|-----------|-------------|--------------------|----------------------------|------------------------------|---------------------------------------------------------------------------------------------------------------------------------------------------------------------------------------------------------------------------------------------------------------------------------------------------------------------------------------------------------------------------------------------------------------------------------------------------------------------------------------------------------------|
| This study              | AC34  | CTAC    | F: NED-<br>TTGACGCGTTGACGACTTACC<br>R: CTTGTCGATAGCGGCTTCAC     | 7         | 23          | 463278             | 269                        | 821663                       | TTGACGCGTTGACGACTTACCACCCTGGCCCGGGTTTAACAA<br>TCAGTTTTCTGTGTGGACACTGCCGTGTAATACTACCTACCTAC<br>CTACCTACCTACCTACCTACCTACCTACCTACCACGCCATCAGC<br>GAGTATCTTAATTCTCCGTAGACTCGCACTTATGATAGCTCGGT<br>GTATGTTAACGCTGCTTCCGCCGAGTCTAACTTACCATCCCGG<br>CCGGTAACCGCGTGCTTTTGGCAGAGCTTGTGAAGCCGCTATC<br>GACAAGT                                                                                                                                                                                                           |
|                         | AC37  | TGA     | F: PET-<br>AAGGACTAGGGAGGCTCTGG<br>R:<br>ATGATGACGCGCTGCGAATGG  | 6         | 25          | 922600             | 239                        | 1000268                      | AAGGACTAGGGAGGCTCTGGAAGTTTAATTCAGGCGTGAAGT<br>CACAGCCACAAATCGCAAAGGAAGGGCATGGGACAAGCTGAT<br>GATGATGATGATGATGATGATGATCTGGATTGGTGACCCGCAA<br>CACGTCTCGTGAGGGTATGGGACAAGCAAACCTTGGGTTGCGC<br>CCACATCTTCAGGAACCGAAAAGAGGTCTCGAAGTGGTCCCTA<br>CAGCCTACCATTGCGAGCGCGTCA                                                                                                                                                                                                                                             |
|                         | AC38  | TCT     | F: FAM-<br>ACAGCAGGATGTGATGGTGAC<br>R:<br>AGAAGCGTGCTGTAATTGAGG | 7         | 28          | 844746             | 271                        | 957909                       | ACAGCAGGATGTGATGGTGACGGGAAATAGTACGTTTCCGCGG<br>TATCGTTTCTCGGTACCGTGTGGTTGTTTCTCCTCGTACTCTTCC<br>TCTTCTCCTCCTCCTCGTCTGAGATCTTCTTCTTCTTCTTCT<br>TCTTCTCCGGTTTTCGTATTCTTCTGTCCCGCAATTTGGGGTGG<br>CCTGAACCTCCGATCTCCCGCTGAGCTTGAGCGTATCCAGAC<br>AACATGCCCATCCGTCTGCCTTCTATCAAGGCCTCAAGTACAGC<br>ACGCTTCT                                                                                                                                                                                                          |
| Baumgartner et al. 2009 | Am109 | GTG     | F: VIC-<br>ATGAGACCCAGAAGTTGAAGA<br>R: CACGTTGACAAATCCAATGC     | 4         | 7           | 148593             | 138                        | 4682282                      | AATGAGACCCAGAAGTTGAAGATACCGCTGACCCCGCCGGCG<br>GGGTTACCACAAATGTCCGGTGGCCTGAGTGGTGGTGGTGGT<br>GTATTACTACTATCACCAGCCGGTTGCTGCGATGCGTCAACTT<br>CGGGTAGAGCTCCAAGACCCGTTGGAAGCGAGCGCGTTGGA<br>TTTGTCGACGT                                                                                                                                                                                                                                                                                                           |
| Prospero et al. 2010    | Arm02 | CA      | F: FAM-<br>ATCGGAGAAGAAGCCAGACC<br>R: AGGCAGGACATCGAGTTGAG      | 1         | 7           | 417266             | 185                        | 4682282                      | GGAGAAGAAGCCAGACCGGTACAACCGCCACGTGCGTCCCTTA<br>CCGGTACACACACACACACACACACACAGCCACCACTGCAAC<br>TTCGAGAGGTATATCAGTTCAATTTCTTCTACGAATTCGATATC<br>CCAACCCATATTCAGGATTCTCAACTCGATGTCCTGCCTCACC<br>TGCAGCAATTGCGGA                                                                                                                                                                                                                                                                                                   |
|                         | Arm05 | GTC     | F: FAM-<br>GAGGAAGAGCTACGCACAGG<br>R: CGGTTTCATCGGAGGTCTA       | 2         | 8           | 1111231            | 457                        | 4279509                      | TGGACATCATGCTCGGGGTCCAGCCGACTACGAAGTCGATAT<br>CTCCCTGATGGCACTGGCAGCAGGCCAGAGAGTCGACGTCCC<br>AGTGCCAGAGGACAAGGCGGACACGAGTGAAAGCGAACCTGA<br>GCCTGAACCGGAAGGAGAGTTGACTTCTTGTTCAGAGAAAA<br>AAGGTGCCTCTTTATTTATTTATTTACTCCACATTTGCTGACAAC<br>ACTGCAGAGGAAGAGCTACGCACAGGAATACTACGACATAAAT<br>GACCCTTTTATTGACGACTCGGAGCTTGCAATTGATGAGCGCAA<br>GTTTTTTGCTCAGACAAAACAGCGAGGATTCTATGTTTCTTCTGA<br>CCAGGTTGCCTTGCTCAAGGATACTCCCAAAGAAAAGTTTCGTC<br>GTCGTCGTCGTCGTCGTCGTCGTCATCGCCACTGACCGAATCG<br>AGTCTAGACCTCCGATGAAACC |

| Study                   | Loci   | Repeats    | Primer sequences (5'-3')                                   | Multiplex | #Scaffold * | Start position, bp | Length of the fragment, bp | Total length of scaffold, bp | Genomic fragments with the SSRs                                                                                                                                                                                                                                                                                                                                                                                                                                                                        |
|-------------------------|--------|------------|------------------------------------------------------------|-----------|-------------|--------------------|----------------------------|------------------------------|--------------------------------------------------------------------------------------------------------------------------------------------------------------------------------------------------------------------------------------------------------------------------------------------------------------------------------------------------------------------------------------------------------------------------------------------------------------------------------------------------------|
| Baumgartner et al. 2009 | Am1 11 | CAC        | F: VIC-<br>CGTCGTCCATTAGAGGCAAC<br>R: GCCATTAGTTTGGCGTTGAG | 4         | 8           | 1981033            | 194                        | 4279509                      | GTCGTCCATTAGAGGCAATTAATTTCTTCACCACAACCACC<br>ACCATCACACACACATTCTCACCAAACACGCAATGGCGAAATCA<br>CTTCGATCCAAAACCAAACGGGATTTCCGTTTCAAGAAGCGAG<br>AAGATGGAATTTATGCAGCAACAGAAGCTGCTCGCCTGCATAG<br>GCTCAATGCCAAACTAATGGCCGTCATAT                                                                                                                                                                                                                                                                               |
| Prospero et al. 2010    | Arm1 6 | TCG        | F: HEX-<br>ATTTGGAATCCTGACGTTGC<br>R: GGCGCATTTGGTCAAAGTAA | 2         | 8           | 3403536            | 189                        | 4279509                      | GTCATTTGGAATCCTGACGTTGCAATAACTCGTCGTACCTGCAA<br>AGGCACCAAGGCCGGTGTGTTGTAGCAGGCTGCCCGAAAACGCT<br>AGTCTGCTGCTGCTGCTGCTGCTGCTGCTGCTGTTGATTGTTAG<br>CGGCGTTACTTTGACCAAATGCGCCACCCTACCGAACGCGCT<br>AGTACTTTTCAATGTCGG                                                                                                                                                                                                                                                                                       |
|                         | Arm1 1 | CAG        | F: FAM-<br>CATCCCTTTTCGGACAGCAC<br>R: TACCAGTCCATCTGGCATGA | 2         | 10          | 3374956            | 217                        | 5884921                      | CGGCATCCCTTTTCGGACAGCACGCGCAAGCCCAATTACACTTG<br>CTTCAGCAGCAGCAGCAGCAGCAGCAGTTGCAGTCTCAGTCGCATC<br>ATTTGCAGAATAACCGCCTCGAGCCGTTATATGAGAGCCGTCTC<br>GATAACCGCAACTTCATGCCAGATGGACTGGTACCTGGCTTAC<br>GGTCCGCCCTCCCCCGCGGAATCGTGAAAACGGTGGGATGT<br>TTT                                                                                                                                                                                                                                                      |
|                         | Arm1 5 | GAC<br>GAC | F: FAM-<br>CGAGCCGTCAACAGAGAATC<br>R: TCCCCAACACAACCTTCTC  | 3         | 10          | 1186644            | 299                        | 5884921                      | AGTTACACGCGTCTCCGAGCCGTCAACAGAGAATCAGACCAAG<br>AAGAGGGAACGAAGCGATGACGACGACGGCGACGACGGCTCT<br>GGCGAGCAAACGCCAGACTCTCCTGTCAAATTGACAGTGACCG<br>AGGAGGAGCTAGACAGTCGGATTTCGAGAAAGGATGACAGAGCA<br>GAGGAATTTTCGAGAAGGTTGTGTTTGGGGACTATGTCATAAGG<br>ACATGGTGAGCACGCTCTGCCGCCTCTTATTGATTTACCTACTA<br>TGCATCTAGGTATTTCTCGCCCTATGTGACGAGCGAAAAACC                                                                                                                                                                 |
|                         | Arm0 9 | GTT<br>CTG | F: HEX-<br>CGTCTCTGGTCCATGAAGGT<br>R: GCCTCAGCAGCACCAGAT   |           | 12          | 1425084            | 448                        | 4638314                      | TGTCGGTGTGCGCGGTGAGCATGTGGATGAGGGACGTGGTGC<br>ATCTGGGATGTGCGCCGGTATGGTGAAGTCAGCGTAATCGACG<br>ACGGCTGTCCCGCCCCATTCCCGCCGCTGACCGCATCTGTGA<br>GTACATCGGCGCGCCATCTGTTTTGCGTCTGTCCCAGGCTCAT<br>GTTTATTGGCTGCACCGTTTGGCCGTACGGCATGTTTATCATT<br>CCATTGACTCTGGAGACAGGTATGTTTCCGTCTCTGGTCCATGA<br>AGGTTTGTGTTTATCATGCNCGACGATGTGTGANAGTGGTGGT<br>GGNGAGCAGTATGTGGTTGTTGTTGTTGTTGCTGTTGCTGTTGC<br>TGCTGTTGCTGTTGAGCTTGTGCTGCTGCTGCTGCTGCTGCTG<br>CTGCTGGCGAGCAAGAGGCGGCACCCTCTGGTGTGCTGCTGAGG<br>CGGCTGCTTGGGAGG |

\*Scaffold of draft genome assembly of the *A. cepistipes* (Sipos et al. unpublished)

Figure S1.1 Positions of SSRs and SNPs in the *Armillaria cepistipes* draft genome assembly (Sipos et al. unpublished) considered in the study:

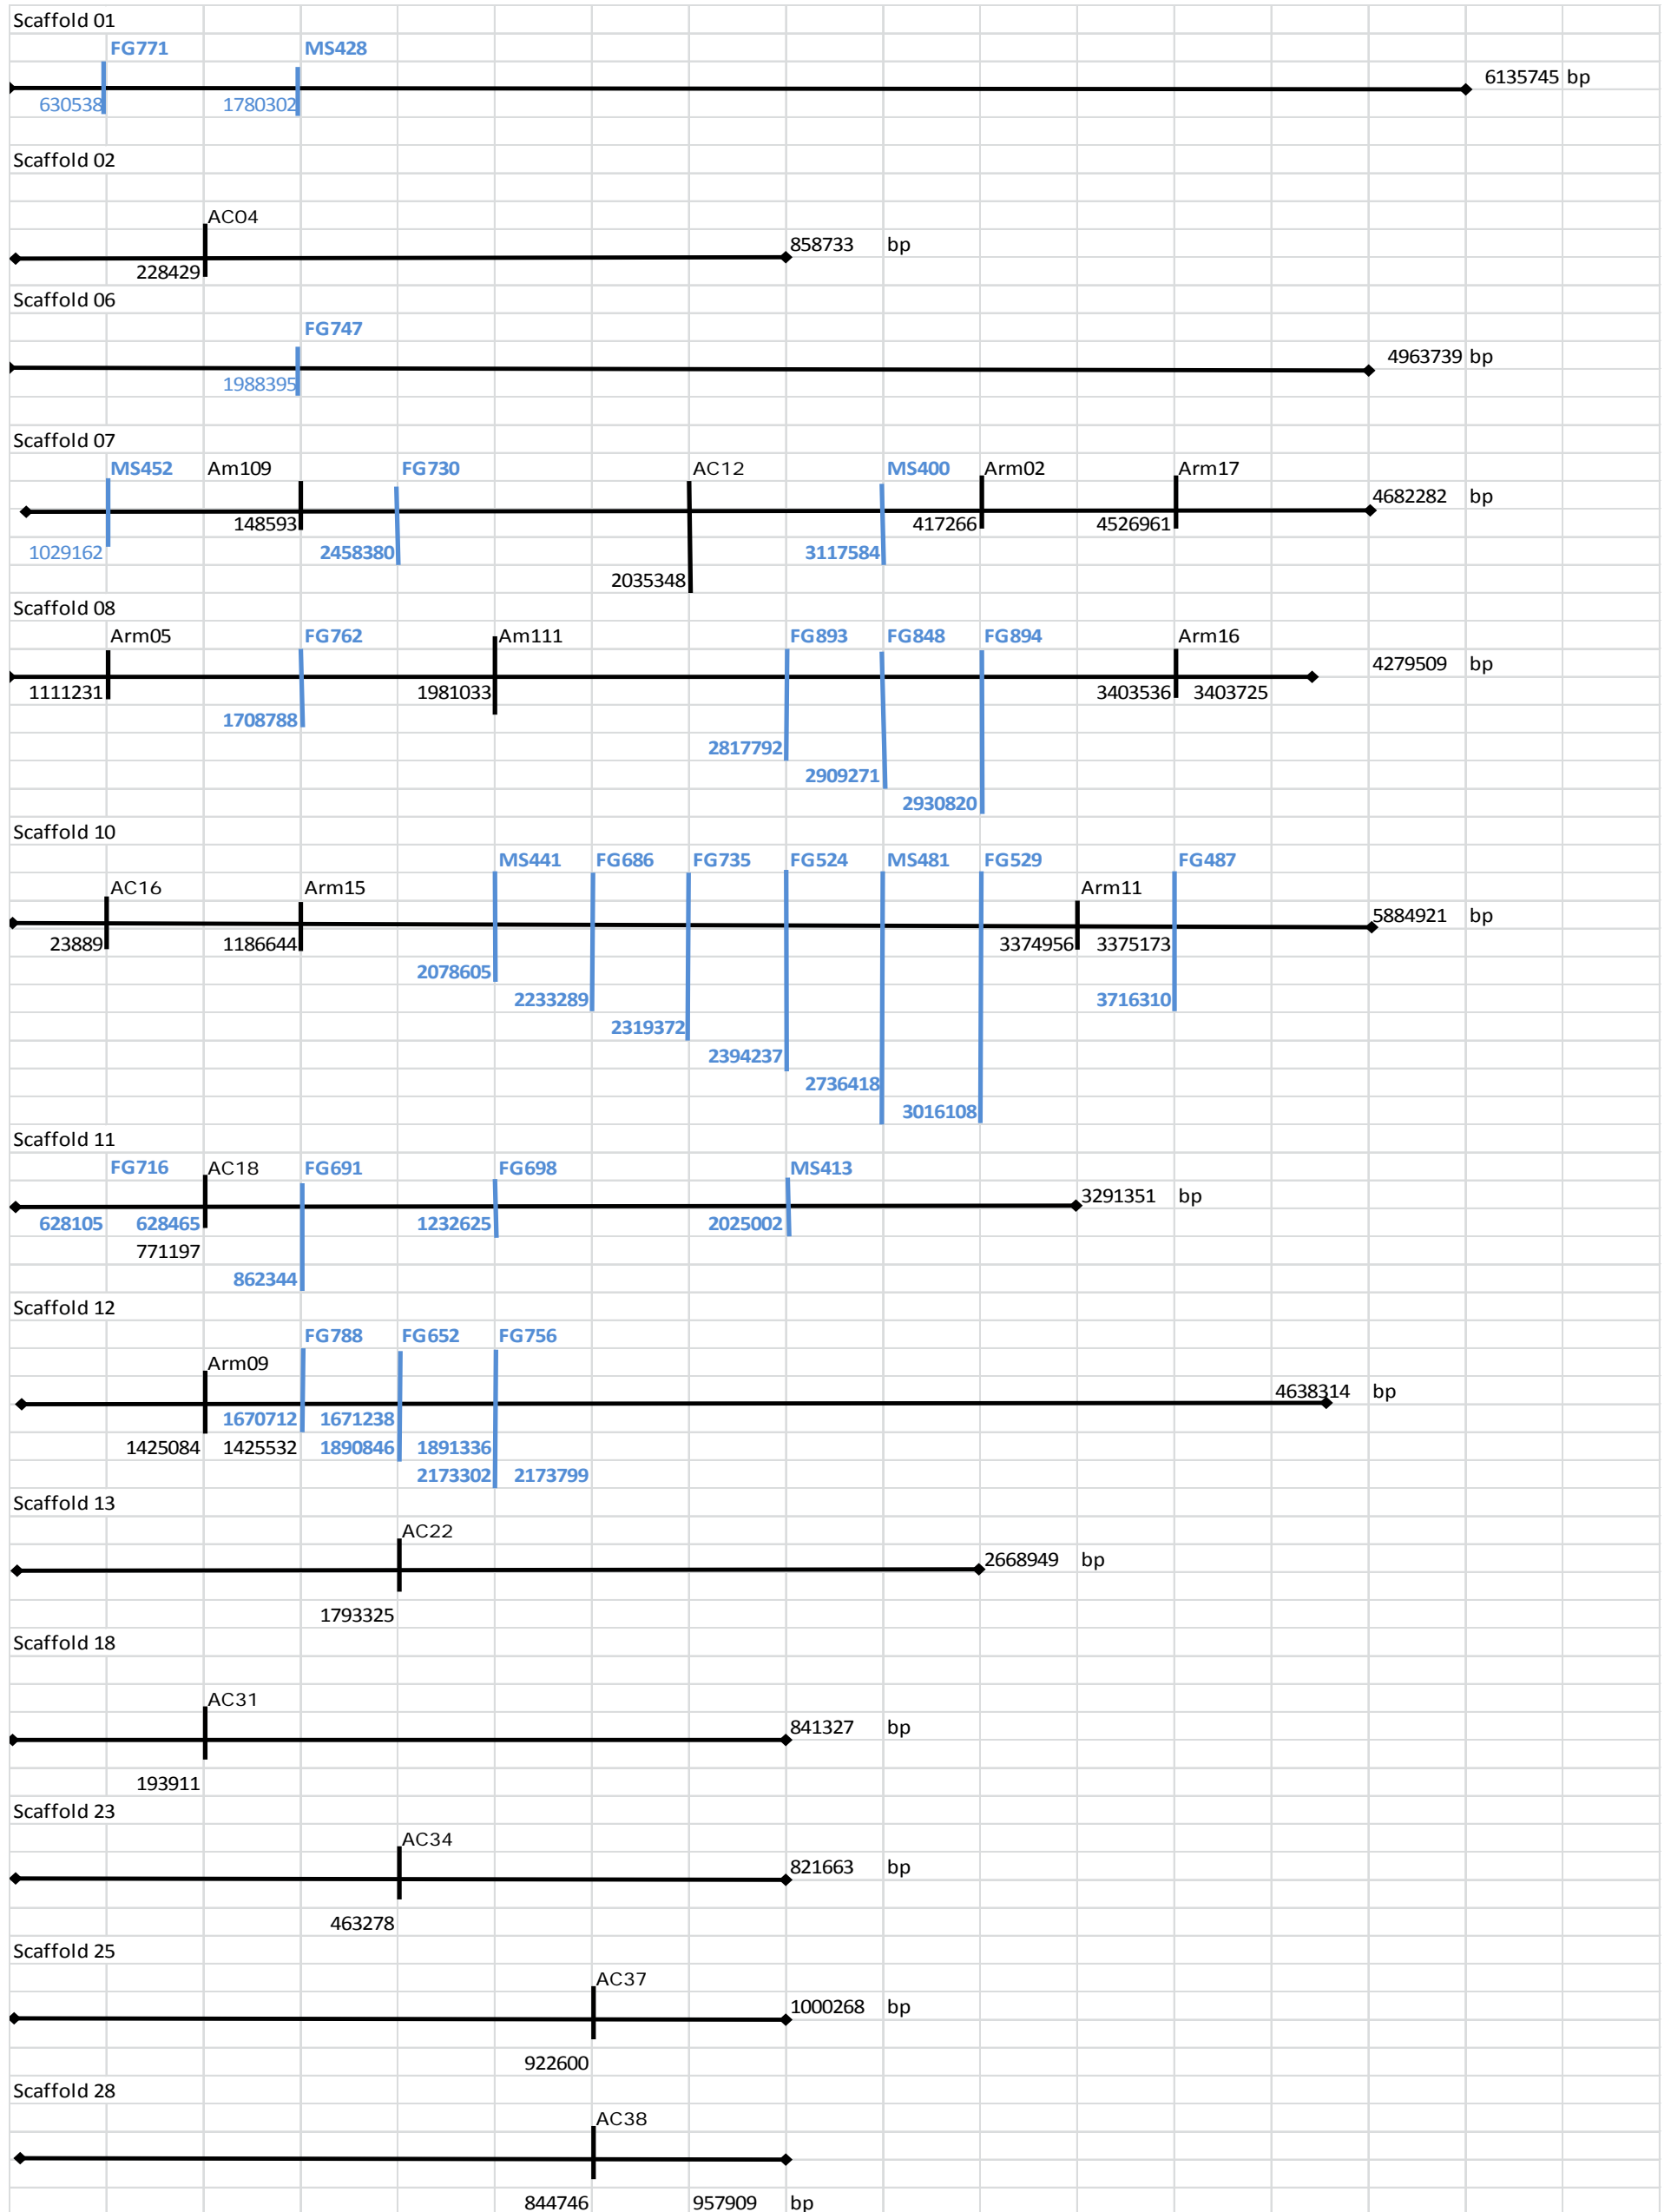

Supplement: hdy201748x1.pdf [file hdy201748x1.pdf]
