# Supplementary material
Source: PubMed Central journal article supplement (PMC5637368)
Supplement: hdy201748x2.pdf [file hdy201748x2.pdf]

Table S2.1 Locus-specific summary statistic for 17 SSR and 31 SNP loci in four subpopulations of *Armillaria cepistipes*: 1 - Carpathian Beech forests, 2 - Carpathian Mixed / conifer, 3 – Alpine North and 4 – Alpine South. Na - number of alleles per locus; Ar - allelic richness; Evenness – index of abundance of alleles across loci;  $H_{exp}$  - expected heterozygosity;  $H_{obs}$  - observed heterozygosity and  $P$  value computed for HWE test. Consistent deviation from Hardy-Weinberg equilibrium across all four subpopulations marked with red color.

**17 SSR loci**  
Carpathian Beech

| Loci        | Na       | Ar       | Evenness    | $H_{exp}$   | $H_{obs}$   | P value       |
|-------------|----------|----------|-------------|-------------|-------------|---------------|
| Arm02       | 5        | 4        | 0.67        | 0.54        | 0.40        | 0.0015        |
| Arm05       | 5        | 5        | 0.79        | 0.71        | 0.71        | 0.1136        |
| Arm09       | 10       | 9        | 0.92        | 0.87        | 0.67        | 0.0000        |
| Arm11       | 8        | 6        | 0.59        | 0.58        | 0.65        | 0.0179        |
| Arm16       | 9        | 8        | 0.73        | 0.78        | 0.76        | 0.0022        |
| Arm15       | 4        | 2        | 0.38        | 0.07        | 0.05        | 0.1349        |
| Am109       | 3        | 2        | 0.51        | 0.15        | 0.14        | 0.0659        |
| Am111       | 5        | 4        | 0.40        | 0.19        | 0.20        | 1.0000        |
| <b>AC18</b> | <b>9</b> | <b>8</b> | <b>0.75</b> | <b>0.80</b> | <b>0.32</b> | <b>0.0000</b> |
| AC31        | 7        | 5        | 0.49        | 0.33        | 0.21        | 0.0000        |
| AC37        | 9        | 8        | 0.63        | 0.66        | 0.75        | 0.2017        |
| AC12        | 5        | 4        | 0.64        | 0.49        | 0.39        | 0.0019        |
| AC16        | 4        | 4        | 0.84        | 0.58        | 0.47        | 0.0563        |
| AC04        | 7        | 6        | 0.52        | 0.54        | 0.57        | 0.0091        |
| AC38        | 6        | 6        | 0.69        | 0.62        | 0.60        | 0.1127        |
| AC22        | 11       | 9        | 0.89        | 0.87        | 0.71        | 0.0000        |
| AC34        | 7        | 5        | 0.37        | 0.18        | 0.17        | 0.6066        |
| <b>mean</b> | 7        | 6        | 0.64        | 0.53        | 0.46        | -*            |
| <b>s.d.</b> | 2        | 2        | 0.2         | 0.26        | 0.24        | -             |

Carpathian Mixed / conifer

| Loci        | Na       | Ar       | Evenness    | $H_{exp}$   | $H_{obs}$   | P value      |
|-------------|----------|----------|-------------|-------------|-------------|--------------|
| Arm02       | 6        | 4        | 0.68        | 0.53        | 0.27        | 0.000        |
| Arm05       | 5        | 5        | 0.76        | 0.69        | 0.59        | 0.001        |
| Arm09       | 11       | 9        | 0.87        | 0.85        | 0.77        | 0.000        |
| Arm11       | 7        | 5        | 0.62        | 0.57        | 0.56        | 0.164        |
| Arm16       | 9        | 8        | 0.70        | 0.76        | 0.73        | 0.004        |
| Arm15       | 4        | 3        | 0.37        | 0.07        | 0.06        | 0.002        |
| Am109       | 2        | 2        | 0.46        | 0.08        | 0.08        | 1.000        |
| Am111       | 3        | 3        | 0.40        | 0.08        | 0.07        | 0.076        |
| <b>AC18</b> | <b>9</b> | <b>8</b> | <b>0.78</b> | <b>0.82</b> | <b>0.43</b> | <b>0.000</b> |
| AC31        | 7        | 6        | 0.53        | 0.50        | 0.38        | 0.001        |
| AC37        | 8        | 7        | 0.72        | 0.69        | 0.66        | 0.080        |
| AC12        | 4        | 4        | 0.65        | 0.49        | 0.47        | 0.764        |
| AC16        | 4        | 4        | 0.81        | 0.57        | 0.44        | 0.000        |
| AC04        | 7        | 7        | 0.53        | 0.57        | 0.58        | 0.053        |
| AC38        | 5        | 5        | 0.67        | 0.60        | 0.58        | 0.019        |
| AC22        | 11       | 10       | 0.85        | 0.87        | 0.69        | 0.000        |
| AC34        | 6        | 5        | 0.40        | 0.23        | 0.25        | 1.000        |
| <b>mean</b> | 6        | 6        | 0.64        | 0.53        | 0.45        | -            |
| <b>s.d.</b> | 3        | 2        | 0.16        | 0.26        | 0.23        | -            |

## Alpine North

| Loci        | Na       | Ar       | Evenness    | H <sub>exp</sub> | H <sub>obs</sub> | P value      |
|-------------|----------|----------|-------------|------------------|------------------|--------------|
| Arm02       | 4        | 4        | 0.76        | 0.56             | 0.45             | 0.150        |
| Arm05       | 5        | 5        | 0.72        | 0.60             | 0.61             | 0.470        |
| Arm09       | 7        | 7        | 0.92        | 0.84             | 0.77             | 0.206        |
| Arm11       | 5        | 5        | 0.78        | 0.63             | 0.58             | 0.040        |
| Arm16       | 7        | 7        | 0.88        | 0.80             | 0.87             | 0.202        |
| Arm15       | 4        | 3        | 0.39        | 0.11             | 0.08             | 0.014        |
| Am109       | 3        | 3        | 0.42        | 0.11             | 0.06             | 0.007        |
| Am111       | 3        | 3        | 0.56        | 0.32             | 0.27             | 0.070        |
| <b>AC18</b> | <b>7</b> | <b>7</b> | <b>0.85</b> | <b>0.81</b>      | <b>0.15</b>      | <b>0.000</b> |
| AC31        | 6        | 6        | 0.56        | 0.53             | 0.47             | 0.049        |
| AC37        | 8        | 7        | 0.80        | 0.79             | 0.79             | 0.311        |
| AC12        | 6        | 5        | 0.65        | 0.49             | 0.52             | 0.158        |
| AC16        | 5        | 5        | 0.67        | 0.55             | 0.44             | 0.047        |
| AC04        | 7        | 6        | 0.51        | 0.46             | 0.42             | 0.040        |
| AC38        | 5        | 5        | 0.69        | 0.54             | 0.50             | 0.373        |
| AC22        | 12       | 11       | 0.79        | 0.87             | 0.71             | 0.015        |
| AC34        | 6        | 5        | 0.42        | 0.27             | 0.26             | 0.656        |
| <b>mean</b> | <b>6</b> | <b>5</b> | <b>0.67</b> | <b>0.55</b>      | <b>0.47</b>      | <b>-</b>     |
| <b>s.d.</b> | <b>2</b> | <b>2</b> | <b>0.17</b> | <b>0.24</b>      | <b>0.24</b>      | <b>-</b>     |

## Alpine South

| Loci        | Na       | Ar       | Evenness    | H <sub>exp</sub> | H <sub>obs</sub> | P value      |
|-------------|----------|----------|-------------|------------------|------------------|--------------|
| Arm02       | 3        | 3        | 0.84        | 0.59             | 0.47             | 0.004        |
| Arm05       | 7        | 6        | 0.64        | 0.59             | 0.64             | 0.988        |
| Arm09       | 8        | 8        | 0.86        | 0.82             | 0.67             | 0.409        |
| Arm11       | 5        | 5        | 0.67        | 0.57             | 0.61             | 0.302        |
| Arm16       | 8        | 8        | 0.85        | 0.82             | 0.86             | 0.775        |
| Arm15       | 3        | 3        | 0.48        | 0.20             | 0.22             | 1.000        |
| Am109       | 3        | 3        | 0.46        | 0.16             | 0.14             | 0.211        |
| Am111       | 3        | 3        | 0.42        | 0.09             | 0.06             | 0.116        |
| <b>AC18</b> | <b>7</b> | <b>7</b> | <b>0.78</b> | <b>0.73</b>      | <b>0.14</b>      | <b>0.000</b> |
| AC31        | 7        | 7        | 0.50        | 0.55             | 0.56             | 0.227        |
| AC37        | 7        | 7        | 0.76        | 0.76             | 0.77             | 0.057        |
| AC12        | 4        | 4        | 0.68        | 0.43             | 0.44             | 0.677        |
| AC16        | 3        | 3        | 0.80        | 0.51             | 0.48             | 0.008        |
| AC04        | 6        | 5        | 0.51        | 0.40             | 0.34             | 0.185        |
| AC38        | 6        | 5        | 0.67        | 0.52             | 0.53             | 0.991        |
| AC22        | 10       | 10       | 0.81        | 0.86             | 0.64             | 0.003        |
| AC34        | 6        | 4        | 0.44        | 0.23             | 0.25             | 1.000        |
| <b>mean</b> | <b>6</b> | <b>5</b> | <b>0.66</b> | <b>0.52</b>      | <b>0.46</b>      | <b>-</b>     |
| <b>s.d.</b> | <b>2</b> | <b>2</b> | <b>0.16</b> | <b>0.24</b>      | <b>0.23</b>      | <b>-</b>     |

### 31 SNP loci

#### Carpathian Beech

| Loci        | Na | Ar | Evenness | H <sub>exp</sub> | H <sub>obs</sub> | P value |
|-------------|----|----|----------|------------------|------------------|---------|
| FG487_3     | 2  | -  | 0.85     | 0.42             | 0.33             | 0.080   |
| FG524_2     | 2  | -  | 0.43     | 0.06             | 0.06             | 1.000   |
| FG529_4     | 2  | -  | 1.00     | 0.50             | 0.44             | 0.230   |
| FG529_5     | 2  | -  | 0.96     | 0.48             | 0.41             | 0.195   |
| FG652_11    | 2  | -  | 1.00     | 0.50             | 0.56             | 0.318   |
| FG652_20    | 2  | -  | 0.72     | 0.32             | 0.34             | 0.511   |
| FG686_3     | 2  | -  | 0.89     | 0.44             | 0.38             | 0.247   |
| FG691_2     | 2  | -  | 0.73     | 0.32             | 0.29             | 0.354   |
| FG698_1     | 2  | -  | 0.93     | 0.47             | 0.48             | 0.830   |
| FG716_4     | 2  | -  | 0.87     | 0.43             | 0.55             | 0.001   |
| FG730_11    | 2  | -  | 0.71     | 0.31             | 0.26             | 0.199   |
| FG735_13    | 2  | -  | 0.41     | 0.05             | 0.05             | 1.000   |
| FG735_16    | 2  | -  | 0.81     | 0.39             | 0.37             | 0.599   |
| FG747_1     | 2  | -  | 0.55     | 0.16             | 0.17             | 1.000   |
| FG747_2     | 2  | -  | 0.64     | 0.25             | 0.15             | 0.000   |
| FG756_2     | 2  | -  | 0.39     | 0.03             | 0.03             | 1.000   |
| FG762_7     | 2  | -  | 1.00     | 0.50             | 0.51             | 1.000   |
| FG771_1     | 2  | -  | 0.55     | 0.16             | 0.17             | 1.000   |
| FG771_3     | 2  | -  | 0.55     | 0.16             | 0.17             | 1.000   |
| FG788_2     | 2  | -  | 0.51     | 0.12             | 0.08             | 0.035   |
| FG848_7     | 2  | -  | 1.00     | 0.50             | 0.40             | 0.079   |
| FG893_2     | 2  | -  | 0.98     | 0.49             | 0.49             | 1.000   |
| FG894_7     | 2  | -  | 0.53     | 0.14             | 0.10             | 0.075   |
| MS400_3     | 2  | -  | 0.64     | 0.25             | 0.24             | 0.663   |
| MS413_1     | 2  | -  | 0.81     | 0.39             | 0.44             | 0.322   |
| MS413_2     | 2  | -  | 0.70     | 0.30             | 0.32             | 0.728   |
| MS428_4     | 2  | -  | 0.39     | 0.03             | 0.03             | 1.000   |
| MS428_6     | 2  | -  | 0.44     | 0.07             | 0.07             | 1.000   |
| MS441_4     | 2  | -  | 1.00     | 0.50             | 0.47             | 0.695   |
| MS452_7     | 2  | -  | 0.69     | 0.29             | 0.29             | 0.707   |
| MS481_16    | 2  | -  | 0.80     | 0.38             | 0.39             | 1.000   |
| <b>mean</b> | 2  | -  | 0.72     | 0.30             | 0.29             | -       |
| <b>s.d.</b> | 0  | -  | 0.21     | 0.17             | 0.17             | -       |

## Carpathian Mixed / conifer

| <b>Loci</b> | <b>Na</b> | <b>Ar</b> | <b>Evenness</b> | <b>H<sub>exp</sub></b> | <b>H<sub>obs</sub></b> | <b>P value</b> |
|-------------|-----------|-----------|-----------------|------------------------|------------------------|----------------|
| FG487_3     | 2         | -         | 0.87            | 0.43                   | 0.44                   | 1.000          |
| FG524_2     | 2         | -         | 0.40            | 0.04                   | 0.04                   | 1.000          |
| FG529_4     | 2         | -         | 0.93            | 0.47                   | 0.47                   | 1.000          |
| FG529_5     | 2         | -         | 0.87            | 0.43                   | 0.47                   | 0.592          |
| FG652_11    | 2         | -         | 0.98            | 0.49                   | 0.47                   | 0.845          |
| FG652_20    | 2         | -         | 0.64            | 0.24                   | 0.22                   | 0.658          |
| FG686_3     | 2         | -         | 0.95            | 0.48                   | 0.50                   | 0.805          |
| FG691_2     | 2         | -         | 0.66            | 0.26                   | 0.31                   | 0.380          |
| FG698_1     | 2         | -         | 0.97            | 0.49                   | 0.51                   | 0.761          |
| FG716_4     | 2         | -         | 0.80            | 0.38                   | 0.35                   | 0.768          |
| FG730_11    | 2         | -         | 0.68            | 0.28                   | 0.25                   | 0.404          |
| FG735_13    | 2         | -         | 0.47            | 0.08                   | 0.09                   | 1.000          |
| FG735_16    | 2         | -         | 0.93            | 0.47                   | 0.56                   | 0.135          |
| FG747_1     | 2         | -         | 0.51            | 0.12                   | 0.13                   | 1.000          |
| FG747_2     | 2         | -         | 0.75            | 0.35                   | 0.26                   | 0.054          |
| FG756_2     | 2         | -         | 0.50            | 0.11                   | 0.09                   | 0.204          |
| FG762_7     | 2         | -         | 1.00            | 0.50                   | 0.49                   | 0.844          |
| FG771_1     | 2         | -         | 0.56            | 0.17                   | 0.19                   | 1.000          |
| FG771_3     | 2         | -         | 0.56            | 0.17                   | 0.19                   | 1.000          |
| FG788_2     | 2         | -         | 0.50            | 0.11                   | 0.12                   | 1.000          |
| FG848_7     | 2         | -         | 1.00            | 0.50                   | 0.40                   | 0.092          |
| FG893_2     | 2         | -         | 0.99            | 0.50                   | 0.54                   | 0.581          |
| FG894_7     | 2         | -         | 0.50            | 0.11                   | 0.09                   | 0.190          |
| MS400_3     | 2         | -         | 0.55            | 0.16                   | 0.18                   | 1.000          |
| MS413_1     | 2         | -         | 0.79            | 0.37                   | 0.43                   | 0.365          |
| MS413_2     | 2         | -         | 0.74            | 0.34                   | 0.43                   | 0.032          |
| MS428_4     | 2         | -         | 0.33            | 0.01                   | 0.01                   | 1.000          |
| MS428_6     | 2         | -         | 0.45            | 0.07                   | 0.07                   | 1.000          |
| MS441_4     | 2         | -         | 1.00            | 0.50                   | 0.54                   | 0.646          |
| MS452_7     | 2         | -         | 0.69            | 0.29                   | 0.29                   | 1.000          |
| MS481_16    | 2         | -         | 0.82            | 0.40                   | 0.37                   | 0.527          |
| <b>mean</b> | 2         | -         | 0.72            | 0.30                   | 0.31                   | -              |
| <b>s.d.</b> | 0         | -         | 0.21            | 0.17                   | 0.17                   | -              |

Alpine North

| <b>Loci</b> | <b>Na</b> | <b>Ar</b> | <b>Evenness</b> | <b>H<sub>exp</sub></b> | <b>H<sub>obs</sub></b> | <b>P value</b> |
|-------------|-----------|-----------|-----------------|------------------------|------------------------|----------------|
| FG487_3     | 2         | -         | 0.83            | 0.40                   | 0.32                   | 0.225          |
| FG524_2     | 2         | -         | 0.55            | 0.16                   | 0.18                   | 1.000          |
| FG529_4     | 2         | -         | 0.81            | 0.39                   | 0.35                   | 0.483          |
| FG529_5     | 2         | -         | 0.67            | 0.27                   | 0.26                   | 0.656          |
| FG652_11    | 2         | -         | 0.98            | 0.49                   | 0.48                   | 1.000          |
| FG652_20    | 2         | -         | 0.72            | 0.31                   | 0.32                   | 1.000          |
| FG686_3     | 2         | -         | 0.87            | 0.43                   | 0.45                   | 0.789          |
| FG691_2     | 2         | -         | 0.63            | 0.24                   | 0.18                   | 0.059          |
| FG698_1     | 2         | -         | 0.90            | 0.45                   | 0.53                   | 0.112          |
| FG716_4     | 2         | -         | 0.94            | 0.47                   | 0.48                   | 1.000          |
| FG730_11    | 2         | -         | 0.94            | 0.47                   | 0.47                   | 1.000          |
| FG735_13    | 2         | -         | 0.52            | 0.14                   | 0.15                   | 1.000          |
| FG735_16    | 2         | -         | 0.87            | 0.43                   | 0.35                   | 0.190          |
| FG747_1     | 1         | -         | -               | -                      | -                      | -              |
| FG747_2     | 2         | -         | 0.77            | 0.36                   | 0.34                   | 0.727          |
| FG756_2     | 2         | -         | 0.54            | 0.15                   | 0.16                   | 1.000          |
| FG762_7     | 2         | -         | 0.98            | 0.49                   | 0.52                   | 0.847          |
| FG771_1     | 2         | -         | 0.66            | 0.26                   | 0.31                   | 0.320          |
| FG771_3     | 2         | -         | 0.66            | 0.26                   | 0.31                   | 0.324          |
| FG788_2     | 2         | -         | 0.41            | 0.05                   | 0.05                   | 1.000          |
| FG848_7     | 2         | -         | 0.96            | 0.49                   | 0.61                   | 0.069          |
| FG893_2     | 2         | -         | 0.85            | 0.42                   | 0.39                   | 0.752          |
| FG894_7     | 1         | -         | -               | -                      | -                      | -              |
| MS400_3     | 2         | -         | 0.64            | 0.25                   | 0.23                   | 0.593          |
| MS413_1     | 2         | -         | 0.74            | 0.33                   | 0.39                   | 0.259          |
| MS413_2     | 2         | -         | 0.72            | 0.31                   | 0.26                   | 0.206          |
| MS428_4     | 2         | -         | 0.52            | 0.14                   | 0.15                   | 1.000          |
| MS428_6     | 2         | -         | 0.52            | 0.14                   | 0.15                   | 1.000          |
| MS441_4     | 2         | -         | 0.88            | 0.43                   | 0.44                   | 1.000          |
| MS452_7     | 2         | -         | 0.91            | 0.45                   | 0.42                   | 0.526          |
| MS481_16    | 2         | -         | 0.49            | 0.11                   | 0.08                   | 0.152          |
| <b>mean</b> | 2         | -         | 0.74            | 0.32                   | 0.32                   | -              |
| <b>s.d.</b> | 0         | -         | 0.17            | 0.14                   | 0.15                   | -              |

## Alpine South

| <b>Loci</b> | <b>Na</b> | <b>Ar</b> | <b>Evenness</b> | <b>H<sub>exp</sub></b> | <b>H<sub>obs</sub></b> | <b>P value</b> |
|-------------|-----------|-----------|-----------------|------------------------|------------------------|----------------|
| FG487_3     | 2         | -         | 0.68            | 0.29                   | 0.28                   | 1.000          |
| FG524_2     | 2         | -         | 0.34            | 0.02                   | 0.02                   | 1.000          |
| FG529_4     | 2         | -         | 0.77            | 0.36                   | 0.38                   | 1.000          |
| FG529_5     | 2         | -         | 0.56            | 0.17                   | 0.16                   | 0.414          |
| FG652_11    | 2         | -         | 0.87            | 0.43                   | 0.45                   | 0.775          |
| FG652_20    | 2         | -         | 0.84            | 0.41                   | 0.41                   | 1.000          |
| FG686_3     | 2         | -         | 0.87            | 0.43                   | 0.30                   | 0.014          |
| FG691_2     | 2         | -         | 0.77            | 0.36                   | 0.28                   | 0.071          |
| FG698_1     | 2         | -         | 0.84            | 0.41                   | 0.44                   | 0.757          |
| FG716_4     | 2         | -         | 0.96            | 0.48                   | 0.52                   | 0.573          |
| FG730_11    | 2         | -         | 0.97            | 0.49                   | 0.36                   | 0.031          |
| FG735_13    | 2         | -         | 0.70            | 0.30                   | 0.20                   | 0.036          |
| FG735_16    | 2         | -         | 0.81            | 0.39                   | 0.42                   | 0.502          |
| FG747_1     | 1         | -         | -               | -                      | -                      | -              |
| FG747_2     | 2         | -         | 0.82            | 0.39                   | 0.34                   | 0.280          |
| FG756_2     | 2         | -         | 0.52            | 0.13                   | 0.14                   | 1.000          |
| FG762_7     | 2         | -         | 0.95            | 0.48                   | 0.33                   | 0.026          |
| FG771_1     | 2         | -         | 0.57            | 0.18                   | 0.17                   | 0.500          |
| FG771_3     | 2         | -         | 0.57            | 0.18                   | 0.17                   | 0.482          |
| FG788_2     | 2         | -         | 0.52            | 0.13                   | 0.14                   | 1.000          |
| FG848_7     | 2         | -         | 0.89            | 0.44                   | 0.44                   | 1.000          |
| FG893_2     | 2         | -         | 0.84            | 0.41                   | 0.38                   | 0.522          |
| FG894_7     | 1         | -         | -               | -                      | -                      | -              |
| MS400_3     | 2         | -         | 0.56            | 0.17                   | 0.19                   | 1.000          |
| MS413_1     | 2         | -         | 0.57            | 0.18                   | 0.17                   | 0.500          |
| MS413_2     | 2         | -         | 0.53            | 0.15                   | 0.16                   | 1.000          |
| MS428_4     | 2         | -         | 0.47            | 0.09                   | 0.09                   | 1.000          |
| MS428_6     | 2         | -         | 0.47            | 0.09                   | 0.09                   | 1.000          |
| MS441_4     | 2         | -         | 1.00            | 0.50                   | 0.31                   | 0.000          |
| MS452_7     | 2         | -         | 0.84            | 0.41                   | 0.34                   | 0.248          |
| MS481_16    | 2         | -         | 0.47            | 0.09                   | 0.09                   | 1.000          |
| <b>mean</b> | 2         | -         | 0.71            | 0.29                   | 0.27                   | -              |
| <b>s.d.</b> | 0         | -         | 0.19            | 0.15                   | 0.13                   | -              |

Table S2.2 Pair-wise linkage disequilibrium among loci in four subpopulations of *Armillaria cepistipes*: 1 - Carpathian Beech, 2 - Carpathian Mixed / conifer, 3 – Alpine North and 4 – Alpine South. Significant deviation from linkage disequilibrium among loci in four subpopulations are marked with red color ( $P$  values < Bonferroni correction with  $\alpha=0.05$ )

| Pairs of loci     | 31 SNP loci               |               |                       |       |
|-------------------|---------------------------|---------------|-----------------------|-------|
|                   | Carpathian subpopulations |               | Alpine subpopulations |       |
|                   | Beech                     | Mixed/conifer | North                 | South |
| FG529_4&FG529_5   | 0.000                     | 0.000         | 0.000                 | 0.000 |
| FG771_1&FG771_3   | 0.000                     | 0.000         | 0.000                 | 0.000 |
| FG735_16&MS481_16 | 0.000                     | 0.280         | 0.195                 | 0.409 |
| FG652_11&FG652_20 | 0.000                     | 0.003         | 0.005                 | 0.000 |
| MS428_4&MS428_6   | 0.000                     | 0.073         | 0.000                 | 0.000 |
| MS400_3&MS428_4   | 0.001                     | 0.173         | 0.255                 | 1.000 |
| FG730_11&MS481_16 | 0.001                     | 0.395         | 0.524                 | 0.868 |
| FG698_1&FG747_1   | 0.001                     | 0.089         | 1.000                 | 1.000 |
| MS400_3&MS428_6   | 0.004                     | 0.578         | 0.256                 | 1.000 |
| FG893_2&MS481_16  | 0.008                     | 0.788         | 1.000                 | 0.354 |
| FG529_4&MS413_1   | 0.008                     | 0.424         | 0.503                 | 0.366 |
| FG524_2&FG652_11  | 0.008                     | 0.420         | 0.033                 | 0.533 |
| FG487_3&FG529_4   | 0.009                     | 0.077         | 0.474                 | 0.880 |
| FG747_2&FG771_3   | 0.016                     | 0.047         | 0.682                 | 0.626 |
| FG747_2&FG771_1   | 0.017                     | 0.049         | 0.682                 | 0.637 |
| FG652_11&FG716_4  | 0.022                     | 0.310         | 0.823                 | 0.183 |
| FG730_11&FG893_2  | 0.022                     | 0.025         | 0.828                 | 0.580 |
| FG686_3&MS428_4   | 0.024                     | 1.000         | 0.698                 | 0.505 |
| FG716_4&FG747_2   | 0.024                     | 0.448         | 0.446                 | 0.759 |
| FG762_7&FG848_7   | 0.026                     | 0.002         | 0.845                 | 0.233 |
| MS441_4&MS481_16  | 0.027                     | 0.219         | 1.000                 | 0.492 |
| FG691_2&MS428_4   | 0.028                     | 1.000         | 0.158                 | 0.556 |
| FG848_7&MS413_1   | 0.031                     | 0.898         | 0.361                 | 0.953 |
| FG652_11&FG698_1  | 0.032                     | 0.163         | 0.469                 | 0.267 |
| FG747_1&FG747_2   | 0.035                     | 0.456         | 1.000                 | 1.000 |
| FG735_16&FG893_2  | 0.035                     | 0.873         | 0.351                 | 0.748 |
| FG524_2&FG771_3   | 0.036                     | 0.615         | 0.292                 | 1.000 |
| FG524_2&FG771_1   | 0.036                     | 0.615         | 0.284                 | 1.000 |
| FG487_3&FG893_2   | 0.037                     | 0.018         | 0.035                 | 0.561 |
| FG848_7&MS452_7   | 0.037                     | 0.429         | 0.147                 | 0.354 |
| FG735_16&MS413_2  | 0.037                     | 0.759         | 0.670                 | 0.138 |
| FG686_3&FG698_1   | 0.037                     | 0.021         | 0.814                 | 0.758 |
| FG529_5&MS428_6   | 0.039                     | 0.460         | 0.581                 | 0.441 |
| FG747_1&MS452_7   | 0.041                     | 1.000         | 1.000                 | 1.000 |
| FG730_11&MS452_7  | 0.048                     | 0.756         | 0.782                 | 0.445 |
| FG529_4&MS413_2   | 0.049                     | 0.482         | 0.644                 | 0.051 |
| FG487_3&MS441_4   | 0.053                     | 0.131         | 1.000                 | 0.745 |

| Pairs of loci    | 31 SNP loci               |               |                       |       |
|------------------|---------------------------|---------------|-----------------------|-------|
|                  | Carpathian subpopulations |               | Alpine subpopulations |       |
|                  | Beech                     | Mixed/conifer | North                 | South |
| FG691_2&MS413_1  | 0.054                     | 0.303         | 0.293                 | 0.860 |
| FG487_3&FG848_7  | 0.054                     | 0.380         | 0.670                 | 0.662 |
| FG652_11&FG686_3 | 0.055                     | 0.034         | 0.694                 | 0.268 |
| FG735_13&MS400_3 | 0.055                     | 0.359         | 0.202                 | 0.867 |
| FG730_11&MS400_3 | 0.056                     | 0.574         | 0.126                 | 0.917 |
| MS413_2&MS441_4  | 0.057                     | 0.015         | 0.961                 | 0.767 |
| FG487_3&FG691_2  | 0.058                     | 0.467         | 0.053                 | 0.894 |
| FG652_20&FG788_2 | 0.059                     | 0.302         | 1.000                 | 0.277 |
| FG771_1&MS428_6  | 0.060                     | 0.381         | 0.430                 | 0.416 |
| FG686_3&FG848_7  | 0.060                     | 0.365         | 0.505                 | 0.598 |
| FG771_3&MS428_6  | 0.061                     | 0.379         | 0.440                 | 0.417 |
| FG529_5&FG747_2  | 0.061                     | 0.564         | 0.679                 | 0.793 |
| FG529_5&FG848_7  | 0.066                     | 0.319         | 0.562                 | 0.779 |
| FG698_1&MS481_16 | 0.066                     | 0.576         | 0.052                 | 0.038 |
| FG686_3&FG691_2  | 0.067                     | 0.002         | 0.902                 | 0.196 |
| FG756_2&FG893_2  | 0.068                     | 1.000         | 0.882                 | 0.173 |
| FG524_2&MS481_16 | 0.075                     | 0.254         | 0.212                 | 1.000 |
| FG771_1&MS428_4  | 0.076                     | 1.000         | 0.440                 | 0.420 |
| FG771_3&MS428_4  | 0.076                     | 1.000         | 0.431                 | 0.422 |
| FG652_11&MS441_4 | 0.078                     | 0.123         | 0.416                 | 0.324 |
| FG529_4&FG848_7  | 0.078                     | 0.646         | 0.158                 | 0.934 |
| FG730_11&MS413_2 | 0.086                     | 0.669         | 0.621                 | 0.469 |
| FG698_1&FG848_7  | 0.086                     | 0.079         | 0.575                 | 0.671 |
| FG686_3&FG730_11 | 0.086                     | 0.231         | 0.730                 | 0.141 |
| FG487_3&MS413_2  | 0.088                     | 0.767         | 0.120                 | 0.788 |
| MS413_1&MS413_2  | 0.088                     | 0.002         | 0.260                 | 1.000 |
| FG524_2&FG529_5  | 0.089                     | 0.248         | 0.805                 | 0.015 |
| FG735_13&MS441_4 | 0.090                     | 0.031         | 0.096                 | 0.239 |
| FG529_4&FG747_1  | 0.091                     | 0.092         | 1.000                 | 1.000 |
| FG716_4&FG730_11 | 0.092                     | 0.016         | 0.809                 | 0.273 |
| FG698_1&MS428_4  | 0.095                     | 0.485         | 0.791                 | 0.780 |
| FG788_2&MS481_16 | 0.095                     | 0.221         | 1.000                 | 1.000 |
| FG487_3&FG747_2  | 0.096                     | 0.889         | 0.340                 | 0.242 |
| FG652_11&FG893_2 | 0.096                     | 0.815         | 0.743                 | 0.567 |
| FG735_16&MS441_4 | 0.096                     | 0.284         | 0.524                 | 0.426 |
| FG698_1&FG756_2  | 0.098                     | 0.043         | 1.000                 | 0.299 |
| FG652_20&FG686_3 | 0.100                     | 0.415         | 0.709                 | 0.964 |
| FG730_11&FG788_2 | 0.113                     | 0.137         | 0.371                 | 0.432 |
| FG686_3&MS428_6  | 0.113                     | 0.057         | 0.699                 | 0.501 |
| FG716_4&FG756_2  | 0.117                     | 0.477         | 0.722                 | 0.630 |



| Pairs of loci     | 31 SNP loci               |               |                       |       |
|-------------------|---------------------------|---------------|-----------------------|-------|
|                   | Carpathian subpopulations |               | Alpine subpopulations |       |
|                   | Beech                     | Mixed/conifer | North                 | South |
| FG747_2&FG893_2   | 0.118                     | 0.237         | 0.705                 | 0.350 |
| FG529_5&FG771_1   | 0.120                     | 0.804         | 0.070                 | 1.000 |
| FG529_5&FG747_1   | 0.122                     | 0.414         | 1.000                 | 1.000 |
| FG747_1&FG771_3   | 0.122                     | 0.357         | 1.000                 | 1.000 |
| FG529_5&MS481_16  | 0.124                     | 0.364         | 0.443                 | 0.447 |
| FG524_2&FG652_20  | 0.125                     | 0.615         | 0.056                 | 1.000 |
| FG771_3&MS400_3   | 0.125                     | 0.437         | 0.471                 | 1.000 |
| FG529_5&FG771_3   | 0.126                     | 0.808         | 0.070                 | 1.000 |
| FG730_11&FG747_2  | 0.126                     | 0.181         | 0.797                 | 0.067 |
| FG716_4&FG735_16  | 0.127                     | 0.095         | 0.399                 | 0.519 |
| FG747_1&FG771_1   | 0.127                     | 0.356         | 1.000                 | 1.000 |
| FG652_20&FG747_2  | 0.128                     | 0.155         | 0.319                 | 0.902 |
| FG771_1&MS400_3   | 0.129                     | 0.434         | 0.474                 | 1.000 |
| FG529_4&FG686_3   | 0.130                     | 0.195         | 0.364                 | 0.101 |
| FG735_13&MS428_4  | 0.133                     | 1.000         | 0.605                 | 0.196 |
| FG686_3&MS452_7   | 0.136                     | 0.167         | 0.796                 | 0.727 |
| FG788_2&FG893_2   | 0.137                     | 0.023         | 0.685                 | 0.878 |
| FG686_3&FG788_2   | 0.137                     | 0.228         | 0.101                 | 0.451 |
| FG652_20&FG691_2  | 0.139                     | 0.898         | 0.927                 | 0.932 |
| FG894_7&MS413_1   | 0.147                     | 0.164         | 1.000                 | 1.000 |
| FG487_3&FG771_1   | 0.151                     | 0.900         | 0.729                 | 1.000 |
| FG652_11&FG848_7  | 0.152                     | 0.863         | 0.535                 | 0.404 |
| FG529_4&MS428_6   | 0.155                     | 0.848         | 1.000                 | 0.460 |
| FG652_20&FG893_2  | 0.156                     | 0.777         | 0.525                 | 0.613 |
| FG487_3&FG771_3   | 0.157                     | 0.897         | 0.730                 | 1.000 |
| FG730_11&FG747_1  | 0.158                     | 0.898         | 1.000                 | 1.000 |
| FG529_5&MS413_1   | 0.159                     | 1.000         | 0.482                 | 1.000 |
| FG894_7&MS452_7   | 0.164                     | 0.164         | 1.000                 | 1.000 |
| FG529_5&MS400_3   | 0.166                     | 0.155         | 0.177                 | 0.222 |
| FG652_11&FG735_13 | 0.169                     | 0.153         | 0.798                 | 0.184 |
| FG848_7&MS481_16  | 0.170                     | 0.115         | 0.529                 | 0.239 |
| FG893_2&MS413_1   | 0.172                     | 0.006         | 0.835                 | 1.000 |
| FG652_20&FG730_11 | 0.172                     | 0.922         | 1.000                 | 0.869 |
| FG524_2&FG691_2   | 0.177                     | 1.000         | 0.394                 | 0.095 |
| FG735_13&MS481_16 | 0.178                     | 0.353         | 0.161                 | 0.374 |
| MS400_3&MS413_1   | 0.179                     | 0.351         | 0.011                 | 0.551 |
| FG487_3&FG698_1   | 0.180                     | 0.371         | 0.826                 | 0.585 |
| FG529_4&FG771_3   | 0.180                     | 0.485         | 0.410                 | 0.249 |
| FG529_4&FG771_1   | 0.181                     | 0.493         | 0.404                 | 0.256 |
| FG747_2&FG788_2   | 0.185                     | 0.864         | 0.628                 | 0.686 |
| FG652_20&MS400_3  | 0.185                     | 0.629         | 0.736                 | 0.285 |
| FG762_7&FG894_7   | 0.186                     | 0.884         | 1.000                 | 1.000 |

| Pairs of loci     | 31 SNP loci               |               |                       |       |
|-------------------|---------------------------|---------------|-----------------------|-------|
|                   | Carpathian subpopulations |               | Alpine subpopulations |       |
|                   | Beech                     | Mixed/conifer | North                 | South |
| FG487_3&FG652_11  | 0.187                     | 0.935         | 0.685                 | 0.170 |
| FG529_5&FG686_3   | 0.188                     | 0.099         | 0.292                 | 0.003 |
| FG762_7&FG771_3   | 0.188                     | 0.209         | 0.000                 | 0.643 |
| FG652_20&FG716_4  | 0.191                     | 1.000         | 0.884                 | 0.560 |
| FG762_7&FG771_1   | 0.192                     | 0.206         | 0.001                 | 0.638 |
| FG487_3&MS400_3   | 0.193                     | 0.430         | 0.797                 | 0.656 |
| FG529_5&FG735_13  | 0.194                     | 0.435         | 0.438                 | 0.622 |
| FG788_2&MS400_3   | 0.197                     | 0.218         | 0.616                 | 0.188 |
| FG698_1&FG788_2   | 0.200                     | 0.244         | 0.073                 | 0.441 |
| FG747_2&FG848_7   | 0.210                     | 0.323         | 0.672                 | 0.729 |
| FG735_16&FG848_7  | 0.214                     | 0.039         | 0.799                 | 0.606 |
| FG698_1&MS413_1   | 0.215                     | 0.917         | 0.921                 | 0.676 |
| FG487_3&FG762_7   | 0.216                     | 0.245         | 0.642                 | 0.561 |
| FG652_11&FG730_11 | 0.218                     | 0.376         | 0.982                 | 0.412 |
| FG771_1&MS441_4   | 0.219                     | 0.002         | 0.852                 | 0.745 |
| FG771_3&MS441_4   | 0.220                     | 0.002         | 0.849                 | 0.746 |
| FG529_5&MS428_4   | 0.222                     | 0.532         | 0.578                 | 0.447 |
| FG652_11&FG691_2  | 0.222                     | 0.939         | 0.985                 | 1.000 |
| FG652_20&FG747_1  | 0.223                     | 1.000         | 1.000                 | 1.000 |
| FG686_3&FG747_2   | 0.224                     | 0.900         | 0.821                 | 0.875 |
| FG691_2&MS400_3   | 0.225                     | 0.316         | 0.605                 | 0.776 |
| FG730_11&FG771_1  | 0.230                     | 0.301         | 0.404                 | 0.409 |
| FG735_13&FG848_7  | 0.231                     | 0.660         | 0.628                 | 0.720 |
| FG730_11&FG771_3  | 0.232                     | 0.309         | 0.400                 | 0.391 |
| FG487_3&FG529_5   | 0.232                     | 0.086         | 0.234                 | 1.000 |
| FG747_2&MS413_1   | 0.235                     | 0.688         | 0.123                 | 0.539 |
| FG747_1&FG893_2   | 0.235                     | 1.000         | 1.000                 | 1.000 |
| MS428_6&MS481_16  | 0.246                     | 1.000         | 0.106                 | 1.000 |
| FG652_11&FG762_7  | 0.247                     | 0.194         | 0.054                 | 0.804 |
| FG652_20&MS413_1  | 0.248                     | 0.958         | 0.767                 | 0.942 |
| FG735_13&MS428_6  | 0.252                     | 0.678         | 0.610                 | 0.196 |
| FG529_4&MS481_16  | 0.252                     | 0.292         | 0.337                 | 0.469 |
| FG686_3&FG735_13  | 0.254                     | 0.467         | 0.578                 | 0.705 |
| FG716_4&FG747_1   | 0.256                     | 0.247         | 1.000                 | 1.000 |
| FG894_7&MS413_2   | 0.256                     | 0.822         | 1.000                 | 1.000 |
| FG691_2&MS413_2   | 0.257                     | 0.790         | 0.567                 | 1.000 |
| FG686_3&FG735_16  | 0.261                     | 0.609         | 0.816                 | 0.138 |
| FG771_1&MS413_1   | 0.261                     | 0.547         | 0.145                 | 0.442 |
| FG524_2&FG848_7   | 0.262                     | 1.000         | 0.269                 | 0.544 |
| FG771_3&MS413_1   | 0.263                     | 0.558         | 0.148                 | 0.452 |
| MS413_1&MS452_7   | 0.267                     | 0.759         | 0.433                 | 0.513 |
| FG716_4&MS452_7   | 0.271                     | 0.972         | 0.826                 | 0.786 |

| Pairs of loci     | 31 SNP loci               |               |                       |       |
|-------------------|---------------------------|---------------|-----------------------|-------|
|                   | Carpathian subpopulations |               | Alpine subpopulations |       |
|                   | Beech                     | Mixed/conifer | North                 | South |
| FG652_11&MS413_2  | 0.275                     | 0.279         | 0.551                 | 0.019 |
| FG698_1&FG762_7   | 0.275                     | 0.033         | 0.778                 | 0.556 |
| MS400_3&MS413_2   | 0.276                     | 1.000         | 0.322                 | 1.000 |
| FG716_4&FG848_7   | 0.280                     | 0.084         | 0.345                 | 0.286 |
| FG735_13&MS413_2  | 0.280                     | 0.230         | 0.620                 | 0.295 |
| FG529_4&MS400_3   | 0.286                     | 0.297         | 0.121                 | 1.000 |
| FG529_5&FG762_7   | 0.290                     | 0.055         | 0.766                 | 0.958 |
| FG730_11&MS441_4  | 0.301                     | 0.536         | 0.675                 | 0.119 |
| FG771_3&FG893_2   | 0.302                     | 0.463         | 0.089                 | 0.671 |
| FG771_1&FG788_2   | 0.302                     | 0.207         | 1.000                 | 0.083 |
| FG747_1&MS441_4   | 0.308                     | 0.808         | 1.000                 | 1.000 |
| MS428_4&MS481_16  | 0.309                     | 1.000         | 0.103                 | 1.000 |
| FG771_1&FG893_2   | 0.310                     | 0.460         | 0.081                 | 0.661 |
| FG698_1&MS428_6   | 0.313                     | 1.000         | 0.792                 | 0.785 |
| FG893_2&MS441_4   | 0.314                     | 0.190         | 0.023                 | 0.105 |
| FG771_3&FG788_2   | 0.315                     | 0.204         | 1.000                 | 0.084 |
| FG524_2&FG686_3   | 0.316                     | 0.565         | 0.334                 | 1.000 |
| FG762_7&MS413_1   | 0.316                     | 0.590         | 0.076                 | 0.099 |
| FG652_11&FG735_16 | 0.317                     | 0.475         | 0.319                 | 0.931 |
| FG762_7&MS428_4   | 0.317                     | 0.223         | 0.298                 | 0.755 |
| FG698_1&FG730_11  | 0.321                     | 0.756         | 0.014                 | 0.299 |
| FG698_1&MS441_4   | 0.323                     | 0.007         | 0.470                 | 0.899 |
| FG652_11&MS481_16 | 0.327                     | 0.494         | 0.022                 | 0.587 |
| FG487_3&FG730_11  | 0.330                     | 0.023         | 0.093                 | 0.884 |
| MS413_1&MS428_6   | 0.333                     | 1.000         | 0.413                 | 1.000 |
| FG730_11&MS413_1  | 0.334                     | 0.197         | 0.943                 | 0.062 |
| FG652_11&FG788_2  | 0.334                     | 0.533         | 0.220                 | 0.341 |
| FG848_7&MS441_4   | 0.336                     | 0.591         | 0.227                 | 0.715 |
| FG788_2&MS413_1   | 0.337                     | 0.377         | 1.000                 | 1.000 |
| FG529_4&MS428_4   | 0.337                     | 0.531         | 1.000                 | 0.469 |
| MS413_2&MS452_7   | 0.340                     | 0.639         | 0.727                 | 0.181 |
| FG735_13&MS452_7  | 0.345                     | 0.128         | 0.350                 | 0.342 |
| FG893_2&MS413_2   | 0.352                     | 0.944         | 0.219                 | 1.000 |
| FG652_20&MS428_4  | 0.353                     | 0.244         | 0.784                 | 0.247 |
| FG686_3&FG771_1   | 0.354                     | 0.245         | 0.252                 | 0.290 |
| FG686_3&FG771_3   | 0.358                     | 0.243         | 0.246                 | 0.286 |
| FG848_7&MS428_4   | 0.359                     | 0.295         | 0.635                 | 0.587 |
| FG698_1&MS400_3   | 0.364                     | 0.065         | 0.830                 | 0.716 |
| FG698_1&FG735_16  | 0.365                     | 0.024         | 0.911                 | 0.026 |
| FG771_1&MS481_16  | 0.366                     | 0.602         | 0.411                 | 1.000 |
| FG691_2&MS428_6   | 0.372                     | 1.000         | 0.156                 | 0.559 |
| FG529_4&FG747_2   | 0.372                     | 0.046         | 0.298                 | 1.000 |
| FG771_3&MS481_16  | 0.372                     | 0.608         | 0.412                 | 1.000 |

| Pairs of loci    | 31 SNP loci               |               |                       |       |
|------------------|---------------------------|---------------|-----------------------|-------|
|                  | Carpathian subpopulations |               | Alpine subpopulations |       |
|                  | Beech                     | Mixed/conifer | North                 | South |
| FG716_4&FG893_2  | 0.373                     | 0.309         | 0.761                 | 0.326 |
| FG735_13&FG762_7 | 0.373                     | 0.225         | 1.000                 | 0.622 |
| FG686_3&FG747_1  | 0.382                     | 0.702         | 1.000                 | 1.000 |
| FG691_2&FG730_11 | 0.386                     | 0.800         | 0.222                 | 0.270 |
| FG893_2&MS428_6  | 0.396                     | 0.616         | 0.223                 | 0.778 |
| FG788_2&FG894_7  | 0.397                     | 0.241         | 1.000                 | 1.000 |
| FG747_1&MS481_16 | 0.397                     | 0.243         | 1.000                 | 1.000 |
| FG524_2&MS400_3  | 0.400                     | 1.000         | 0.443                 | 0.189 |
| FG652_20&MS452_7 | 0.401                     | 0.933         | 0.071                 | 0.942 |
| FG735_16&FG771_3 | 0.402                     | 0.121         | 0.802                 | 0.127 |
| FG487_3&FG524_2  | 0.406                     | 0.425         | 1.000                 | 1.000 |
| FG735_16&FG771_1 | 0.408                     | 0.115         | 0.803                 | 0.126 |
| FG529_4&FG652_20 | 0.408                     | 0.820         | 0.809                 | 0.677 |
| FG716_4&MS441_4  | 0.418                     | 0.033         | 0.438                 | 0.366 |
| FG762_7&MS413_2  | 0.418                     | 0.952         | 0.962                 | 0.906 |
| FG652_20&FG894_7 | 0.420                     | 0.761         | 1.000                 | 1.000 |
| FG652_20&MS413_2 | 0.430                     | 0.887         | 0.749                 | 0.018 |
| FG529_4&MS441_4  | 0.431                     | 0.752         | 0.941                 | 0.906 |
| FG652_11&FG894_7 | 0.437                     | 1.000         | 1.000                 | 1.000 |
| FG848_7&FG893_2  | 0.440                     | 0.042         | 0.496                 | 0.166 |
| FG529_4&FG698_1  | 0.442                     | 0.406         | 0.712                 | 0.237 |
| FG691_2&FG848_7  | 0.443                     | 0.181         | 0.959                 | 0.488 |
| FG735_16&FG894_7 | 0.445                     | 0.928         | 1.000                 | 1.000 |
| FG691_2&MS441_4  | 0.446                     | 0.313         | 0.845                 | 0.253 |
| FG524_2&FG762_7  | 0.448                     | 1.000         | 0.732                 | 1.000 |
| FG747_2&MS413_2  | 0.449                     | 0.308         | 0.746                 | 0.313 |
| FG730_11&FG848_7 | 0.453                     | 0.108         | 0.552                 | 0.464 |
| FG716_4&FG788_2  | 0.455                     | 0.627         | 0.572                 | 0.300 |
| FG487_3&FG716_4  | 0.461                     | 0.929         | 0.247                 | 0.265 |
| FG686_3&MS400_3  | 0.463                     | 0.614         | 0.150                 | 0.466 |
| FG686_3&FG716_4  | 0.465                     | 0.278         | 0.204                 | 0.561 |
| FG529_4&FG730_11 | 0.468                     | 0.391         | 0.578                 | 0.752 |
| FG894_7&MS481_16 | 0.469                     | 0.494         | 1.000                 | 1.000 |
| FG487_3&FG788_2  | 0.472                     | 0.201         | 1.000                 | 0.787 |
| FG762_7&MS428_6  | 0.474                     | 0.701         | 0.302                 | 0.755 |
| FG524_2&FG716_4  | 0.475                     | 1.000         | 0.112                 | 1.000 |
| FG698_1&FG894_7  | 0.479                     | 0.867         | 1.000                 | 1.000 |
| FG686_3&MS413_2  | 0.480                     | 0.441         | 0.005                 | 0.245 |
| FG487_3&FG686_3  | 0.486                     | 0.796         | 0.050                 | 0.031 |
| MS400_3&MS481_16 | 0.487                     | 0.501         | 0.541                 | 0.341 |
| FG686_3&MS481_16 | 0.488                     | 0.619         | 0.886                 | 0.017 |
| FG529_5&FG716_4  | 0.489                     | 0.147         | 0.734                 | 0.463 |
| FG529_5&FG735_16 | 0.492                     | 0.603         | 0.484                 | 0.617 |
| FG652_20&MS441_4 | 0.492                     | 0.768         | 0.344                 | 0.635 |
| FG762_7&MS452_7  | 0.495                     | 0.984         | 0.794                 | 0.913 |
| FG735_16&MS400_3 | 0.498                     | 0.791         | 0.185                 | 0.215 |
| FG652_20&FG848_7 | 0.502                     | 1.000         | 0.689                 | 0.175 |

| Pairs of loci     | 31 SNP loci               |               |                       |       |
|-------------------|---------------------------|---------------|-----------------------|-------|
|                   | Carpathian subpopulations |               | Alpine subpopulations |       |
|                   | Beech                     | Mixed/conifer | North                 | South |
| FG529_5&MS413_2   | 0.503                     | 0.250         | 0.179                 | 0.224 |
| FG524_2&MS441_4   | 0.517                     | 1.000         | 0.352                 | 1.000 |
| FG788_2&MS452_7   | 0.518                     | 1.000         | 1.000                 | 0.388 |
| FG735_16&MS428_6  | 0.520                     | 0.555         | 0.773                 | 0.397 |
| FG529_5&FG698_1   | 0.523                     | 0.546         | 0.957                 | 0.028 |
| FG848_7&FG894_7   | 0.524                     | 1.000         | 1.000                 | 1.000 |
| FG652_20&MS481_16 | 0.532                     | 0.450         | 0.123                 | 1.000 |
| FG529_5&MS441_4   | 0.541                     | 0.705         | 0.938                 | 0.968 |
| FG487_3&MS452_7   | 0.546                     | 0.527         | 0.407                 | 0.970 |
| FG698_1&MS452_7   | 0.551                     | 0.265         | 0.264                 | 0.009 |
| FG686_3&FG893_2   | 0.552                     | 0.622         | 0.345                 | 0.123 |
| FG691_2&FG894_7   | 0.556                     | 0.164         | 1.000                 | 1.000 |
| FG529_4&FG735_16  | 0.556                     | 0.934         | 0.535                 | 1.000 |
| FG691_2&FG788_2   | 0.566                     | 0.097         | 0.673                 | 0.164 |
| FG529_5&MS452_7   | 0.566                     | 0.091         | 0.875                 | 0.012 |
| FG747_2&MS452_7   | 0.568                     | 0.049         | 0.746                 | 0.566 |
| FG893_2&MS428_4   | 0.576                     | 0.454         | 0.221                 | 0.777 |
| FG652_20&FG756_2  | 0.576                     | 0.770         | 0.545                 | 0.522 |
| FG716_4&MS413_1   | 0.579                     | 0.657         | 0.408                 | 0.122 |
| FG735_16&MS413_1  | 0.581                     | 0.880         | 0.244                 | 0.613 |
| FG652_11&MS452_7  | 0.582                     | 0.068         | 0.315                 | 0.638 |
| FG524_2&FG747_1   | 0.583                     | 1.000         | 1.000                 | 1.000 |
| FG747_1&MS400_3   | 0.585                     | 0.689         | 1.000                 | 1.000 |
| FG747_1&MS428_6   | 0.585                     | 0.607         | 1.000                 | 1.000 |
| MS400_3&MS441_4   | 0.590                     | 0.363         | 0.870                 | 0.448 |
| FG756_2&MS452_7   | 0.597                     | 0.413         | 0.894                 | 0.682 |
| FG529_5&FG652_20  | 0.597                     | 0.249         | 0.524                 | 0.016 |
| FG894_7&MS400_3   | 0.598                     | 0.471         | 1.000                 | 1.000 |
| FG756_2&MS400_3   | 0.600                     | 1.000         | 0.444                 | 0.347 |
| FG756_2&FG762_7   | 0.602                     | 0.066         | 0.421                 | 0.743 |
| FG529_4&MS452_7   | 0.607                     | 0.170         | 0.875                 | 0.014 |
| FG524_2&FG747_2   | 0.607                     | 1.000         | 0.424                 | 1.000 |
| FG747_1&FG788_2   | 0.609                     | 1.000         | 1.000                 | 1.000 |
| FG652_11&FG756_2  | 0.611                     | 1.000         | 0.822                 | 0.091 |
| MS413_2&MS481_16  | 0.612                     | 0.286         | 0.287                 | 0.580 |
| FG756_2&FG848_7   | 0.616                     | 0.036         | 0.434                 | 0.875 |
| FG652_11&MS413_1  | 0.616                     | 0.277         | 0.021                 | 0.725 |
| FG698_1&FG771_3   | 0.620                     | 0.029         | 0.743                 | 0.076 |
| FG698_1&FG771_1   | 0.625                     | 0.026         | 0.749                 | 0.081 |
| FG762_7&MS400_3   | 0.627                     | 0.508         | 0.448                 | 0.920 |
| FG529_5&FG730_11  | 0.628                     | 0.435         | 0.814                 | 0.070 |
| FG686_3&FG762_7   | 0.629                     | 0.654         | 0.562                 | 0.907 |
| FG735_16&FG788_2  | 0.633                     | 0.309         | 0.709                 | 0.910 |
| FG730_11&FG756_2  | 0.634                     | 1.000         | 0.894                 | 0.809 |
| FG652_11&FG747_2  | 0.634                     | 0.397         | 0.127                 | 0.496 |
| FG756_2&FG771_3   | 0.638                     | 0.664         | 0.262                 | 0.733 |
| FG747_1&FG756_2   | 0.638                     | 0.646         | 1.000                 | 1.000 |
| FG756_2&FG771_1   | 0.639                     | 0.666         | 0.258                 | 0.731 |

| Pairs of loci     | 31 SNP loci               |               |                       |       |
|-------------------|---------------------------|---------------|-----------------------|-------|
|                   | Carpathian subpopulations |               | Alpine subpopulations |       |
|                   | Beech                     | Mixed/conifer | North                 | South |
| FG762_7&MS481_16  | 0.642                     | 0.984         | 0.267                 | 1.000 |
| FG487_3&FG735_13  | 0.642                     | 0.591         | 0.312                 | 0.073 |
| FG747_2&MS400_3   | 0.644                     | 0.529         | 0.817                 | 0.794 |
| MS413_1&MS428_4   | 0.647                     | 1.000         | 0.402                 | 1.000 |
| FG698_1&MS413_2   | 0.649                     | 0.713         | 0.899                 | 0.890 |
| FG487_3&MS428_6   | 0.656                     | 0.667         | 0.680                 | 1.000 |
| FG686_3&MS441_4   | 0.657                     | 0.557         | 0.093                 | 0.008 |
| FG762_7&FG893_2   | 0.658                     | 0.721         | 0.241                 | 0.555 |
| FG730_11&FG735_13 | 0.663                     | 0.004         | 0.415                 | 0.859 |
| MS413_1&MS481_16  | 0.663                     | 0.406         | 0.807                 | 1.000 |
| FG762_7&MS441_4   | 0.666                     | 0.440         | 0.551                 | 0.891 |
| FG691_2&FG735_13  | 0.672                     | 0.656         | 0.777                 | 0.455 |
| FG747_1&FG848_7   | 0.677                     | 0.100         | 1.000                 | 1.000 |
| FG529_4&FG652_11  | 0.678                     | 0.082         | 0.034                 | 0.750 |
| FG730_11&FG762_7  | 0.684                     | 0.096         | 0.830                 | 0.077 |
| FG652_20&FG762_7  | 0.685                     | 0.264         | 0.070                 | 0.761 |
| FG529_4&FG691_2   | 0.686                     | 0.092         | 0.089                 | 0.016 |
| FG716_4&MS400_3   | 0.691                     | 0.133         | 0.248                 | 0.501 |
| FG524_2&FG894_7   | 0.693                     | 1.000         | 1.000                 | 1.000 |
| FG747_1&MS413_2   | 0.695                     | 0.719         | 1.000                 | 1.000 |
| FG698_1&FG893_2   | 0.707                     | 0.247         | 0.178                 | 0.103 |
| FG788_2&MS428_6   | 0.709                     | 0.626         | 0.672                 | 0.416 |
| FG524_2&FG529_4   | 0.718                     | 0.357         | 0.328                 | 0.047 |
| FG893_2&FG894_7   | 0.718                     | 0.000         | 1.000                 | 1.000 |
| FG698_1&FG747_2   | 0.719                     | 0.045         | 0.782                 | 1.000 |
| FG747_2&FG756_2   | 0.719                     | 0.566         | 0.006                 | 0.780 |
| FG691_2&FG747_1   | 0.724                     | 1.000         | 1.000                 | 1.000 |
| FG848_7&MS413_2   | 0.725                     | 0.905         | 0.988                 | 0.251 |
| FG524_2&FG788_2   | 0.729                     | 0.315         | 0.629                 | 1.000 |
| FG524_2&MS452_7   | 0.734                     | 0.409         | 0.649                 | 0.109 |
| FG529_4&FG762_7   | 0.739                     | 0.346         | 0.963                 | 0.768 |
| FG524_2&FG698_1   | 0.743                     | 0.407         | 0.793                 | 0.062 |
| FG747_1&FG762_7   | 0.754                     | 1.000         | 1.000                 | 1.000 |
| FG762_7&FG788_2   | 0.757                     | 0.060         | 1.000                 | 0.405 |
| FG716_4&MS428_6   | 0.757                     | 0.220         | 0.264                 | 0.753 |
| FG771_3&MS452_7   | 0.758                     | 0.668         | 0.111                 | 1.000 |
| FG735_16&FG747_1  | 0.760                     | 0.689         | 1.000                 | 1.000 |
| FG848_7&MS428_6   | 0.761                     | 0.002         | 0.628                 | 0.589 |
| FG771_1&MS452_7   | 0.761                     | 0.667         | 0.106                 | 1.000 |
| FG730_11&FG735_16 | 0.772                     | 0.652         | 0.782                 | 0.978 |
| FG529_5&FG893_2   | 0.773                     | 0.150         | 0.709                 | 0.882 |
| FG747_2&FG894_7   | 0.778                     | 0.214         | 1.000                 | 1.000 |
| FG691_2&FG716_4   | 0.778                     | 0.850         | 0.349                 | 0.785 |
| FG487_3&MS481_16  | 0.780                     | 0.954         | 0.854                 | 0.461 |
| FG529_5&FG652_11  | 0.783                     | 0.113         | 0.677                 | 0.059 |
| FG487_3&FG747_1   | 0.792                     | 0.001         | 1.000                 | 1.000 |
| FG771_1&FG894_7   | 0.792                     | 0.257         | 1.000                 | 1.000 |
| FG756_2&MS441_4   | 0.794                     | 1.000         | 0.882                 | 0.363 |
| FG771_3&FG894_7   | 0.794                     | 0.253         | 1.000                 | 1.000 |

| Pairs of loci     | 31 SNP loci               |               |                       |       |
|-------------------|---------------------------|---------------|-----------------------|-------|
|                   | Carpathian subpopulations |               | Alpine subpopulations |       |
|                   | Beech                     | Mixed/conifer | North                 | South |
| FG691_2&FG747_2   | 0.794                     | 0.384         | 1.000                 | 0.205 |
| FG747_1&FG894_7   | 0.794                     | 1.000         | 1.000                 | 1.000 |
| MS428_4&MS441_4   | 0.797                     | 0.458         | 0.281                 | 0.869 |
| FG747_2&MS441_4   | 0.797                     | 0.122         | 0.537                 | 0.128 |
| FG529_5&FG756_2   | 0.803                     | 0.856         | 0.084                 | 0.680 |
| FG652_20&FG735_16 | 0.807                     | 0.038         | 0.468                 | 0.790 |
| FG487_3&FG735_16  | 0.811                     | 0.292         | 0.898                 | 0.718 |
| FG529_4&FG735_13  | 0.813                     | 0.098         | 0.877                 | 1.000 |
| FG529_4&FG894_7   | 0.825                     | 0.073         | 1.000                 | 1.000 |
| FG529_4&FG716_4   | 0.827                     | 0.117         | 0.570                 | 0.436 |
| FG735_16&FG747_2  | 0.827                     | 0.186         | 0.853                 | 0.592 |
| FG487_3&MS413_1   | 0.830                     | 0.074         | 0.388                 | 0.696 |
| FG716_4&FG762_7   | 0.835                     | 0.562         | 0.265                 | 0.669 |
| FG771_3&MS413_2   | 0.835                     | 0.379         | 0.163                 | 0.728 |
| FG652_11&MS428_4  | 0.835                     | 1.000         | 0.799                 | 0.057 |
| FG698_1&FG716_4   | 0.836                     | 0.204         | 0.068                 | 0.347 |
| FG771_1&MS413_2   | 0.837                     | 0.366         | 0.166                 | 0.728 |
| FG652_20&FG771_3  | 0.842                     | 0.638         | 0.624                 | 0.761 |
| FG747_2&FG762_7   | 0.842                     | 0.186         | 0.302                 | 0.367 |
| FG686_3&FG756_2   | 0.843                     | 0.816         | 0.248                 | 0.495 |
| FG652_20&FG771_1  | 0.843                     | 0.644         | 0.621                 | 0.769 |
| FG893_2&MS400_3   | 0.846                     | 0.035         | 0.824                 | 1.000 |
| FG691_2&MS452_7   | 0.851                     | 0.577         | 0.868                 | 0.105 |
| MS452_7&MS481_16  | 0.852                     | 0.645         | 0.326                 | 0.035 |
| FG848_7&MS400_3   | 0.853                     | 0.072         | 0.396                 | 0.541 |
| FG691_2&FG698_1   | 0.856                     | 0.008         | 0.622                 | 0.076 |
| FG652_20&FG698_1  | 0.863                     | 0.818         | 0.234                 | 0.252 |
| FG652_11&FG747_1  | 0.863                     | 0.410         | 1.000                 | 1.000 |
| FG730_11&FG894_7  | 0.865                     | 1.000         | 1.000                 | 1.000 |
| FG893_2&MS452_7   | 0.868                     | 0.610         | 0.423                 | 0.940 |
| FG747_2&MS428_6   | 0.872                     | 1.000         | 0.711                 | 0.184 |
| FG691_2&FG893_2   | 0.880                     | 0.187         | 0.465                 | 0.592 |
| FG788_2&MS413_2   | 0.883                     | 1.000         | 1.000                 | 1.000 |
| FG788_2&MS441_4   | 0.884                     | 0.541         | 0.101                 | 0.293 |
| MS413_1&MS441_4   | 0.890                     | 0.557         | 0.765                 | 1.000 |
| MS400_3&MS452_7   | 0.898                     | 0.828         | 0.910                 | 0.207 |
| FG747_1&MS413_1   | 0.909                     | 0.329         | 1.000                 | 1.000 |
| FG716_4&FG894_7   | 0.913                     | 0.095         | 1.000                 | 1.000 |
| FG686_3&FG894_7   | 0.921                     | 1.000         | 1.000                 | 1.000 |
| FG487_3&FG894_7   | 0.922                     | 0.085         | 1.000                 | 1.000 |
| FG686_3&MS413_1   | 0.924                     | 0.019         | 0.582                 | 0.280 |
| FG747_2&MS481_16  | 0.924                     | 0.241         | 0.088                 | 0.866 |
| FG652_11&FG771_3  | 0.927                     | 0.524         | 0.201                 | 0.352 |
| FG529_4&FG893_2   | 0.928                     | 0.219         | 0.883                 | 0.626 |
| FG652_11&FG771_1  | 0.929                     | 0.525         | 0.190                 | 0.348 |
| FG529_5&FG788_2   | 0.930                     | 0.449         | 1.000                 | 0.680 |
| FG771_1&FG848_7   | 0.936                     | 0.174         | 1.000                 | 0.902 |
| FG771_3&FG848_7   | 0.936                     | 0.174         | 1.000                 | 0.903 |
| FG691_2&FG762_7   | 0.937                     | 0.340         | 0.282                 | 0.150 |

| Pairs of loci     | 31 SNP loci               |               |                       |       |
|-------------------|---------------------------|---------------|-----------------------|-------|
|                   | Carpathian subpopulations |               | Alpine subpopulations |       |
|                   | Beech                     | Mixed/conifer | North                 | South |
| FG529_5&FG894_7   | 0.942                     | 0.140         | 1.000                 | 1.000 |
| FG652_11&MS400_3  | 0.942                     | 0.483         | 0.136                 | 0.525 |
| MS441_4&MS452_7   | 0.948                     | 0.808         | 1.000                 | 0.917 |
| FG894_7&MS441_4   | 0.954                     | 0.793         | 1.000                 | 1.000 |
| FG716_4&MS481_16  | 0.957                     | 0.033         | 0.085                 | 0.748 |
| FG716_4&MS413_2   | 0.963                     | 0.241         | 0.257                 | 0.572 |
| FG529_5&FG691_2   | 0.977                     | 0.863         | 0.115                 | 0.015 |
| FG691_2&FG735_16  | 0.977                     | 1.000         | 0.279                 | 0.954 |
| FG735_16&MS452_7  | 0.978                     | 0.862         | 0.570                 | 0.082 |
| FG487_3&FG652_20  | 0.982                     | 0.202         | 0.843                 | 0.720 |
| FG691_2&MS481_16  | 0.984                     | 1.000         | 1.000                 | 0.878 |
| FG735_16&FG762_7  | 0.991                     | 0.084         | 0.944                 | 0.445 |
| FG756_2&MS428_4   | 1.000                     | 1.000         | 0.030                 | 1.000 |
| FG756_2&MS428_6   | 1.000                     | 0.076         | 0.030                 | 1.000 |
| FG735_16&FG756_2  | 1.000                     | 0.831         | 0.033                 | 1.000 |
| FG698_1&FG735_13  | 1.000                     | 0.046         | 0.146                 | 0.369 |
| FG756_2&MS413_2   | 1.000                     | 0.521         | 0.153                 | 1.000 |
| FG524_2&FG730_11  | 1.000                     | 1.000         | 0.163                 | 0.237 |
| FG735_13&FG756_2  | 1.000                     | 0.678         | 0.214                 | 0.419 |
| FG716_4&MS428_4   | 1.000                     | 0.429         | 0.269                 | 0.751 |
| MS428_6&MS441_4   | 1.000                     | 1.000         | 0.270                 | 0.866 |
| MS428_6&MS452_7   | 1.000                     | 0.403         | 0.314                 | 0.068 |
| MS428_4&MS452_7   | 1.000                     | 1.000         | 0.320                 | 0.069 |
| FG716_4&FG771_3   | 1.000                     | 0.399         | 0.323                 | 0.821 |
| FG716_4&FG771_1   | 1.000                     | 0.402         | 0.327                 | 0.824 |
| FG524_2&MS413_2   | 1.000                     | 0.571         | 0.364                 | 1.000 |
| FG735_13&FG735_16 | 1.000                     | 0.351         | 0.373                 | 0.017 |
| FG730_11&MS428_6  | 1.000                     | 0.258         | 0.373                 | 0.757 |
| FG730_11&MS428_4  | 1.000                     | 1.000         | 0.379                 | 0.755 |
| FG756_2&MS413_1   | 1.000                     | 0.849         | 0.406                 | 0.733 |
| FG735_13&FG747_2  | 1.000                     | 0.564         | 0.434                 | 0.140 |
| FG524_2&FG893_2   | 1.000                     | 0.580         | 0.591                 | 1.000 |
| FG652_20&FG735_13 | 1.000                     | 0.681         | 0.626                 | 0.766 |
| FG756_2&MS481_16  | 1.000                     | 0.928         | 0.646                 | 0.419 |
| FG756_2&FG788_2   | 1.000                     | 1.000         | 0.647                 | 0.340 |
| FG788_2&FG848_7   | 1.000                     | 0.327         | 0.667                 | 0.104 |
| FG788_2&MS428_4   | 1.000                     | 1.000         | 0.669                 | 0.414 |
| FG735_13&FG788_2  | 1.000                     | 0.600         | 0.671                 | 0.669 |
| FG487_3&MS428_4   | 1.000                     | 0.531         | 0.683                 | 1.000 |
| FG747_2&MS428_4   | 1.000                     | 0.349         | 0.711                 | 0.185 |
| FG524_2&FG735_16  | 1.000                     | 0.337         | 0.734                 | 0.469 |
| FG529_4&FG756_2   | 1.000                     | 0.704         | 0.768                 | 0.904 |
| FG691_2&FG756_2   | 1.000                     | 1.000         | 0.774                 | 0.408 |
| FG735_16&MS428_4  | 1.000                     | 0.448         | 0.776                 | 0.397 |
| FG652_20&MS428_6  | 1.000                     | 1.000         | 0.787                 | 0.239 |
| FG524_2&MS413_1   | 1.000                     | 0.608         | 0.789                 | 1.000 |
| FG652_11&MS428_6  | 1.000                     | 0.490         | 0.796                 | 0.056 |
| FG735_13&FG893_2  | 1.000                     | 0.856         | 0.879                 | 0.785 |
| FG716_4&FG735_13  | 1.000                     | 0.045         | 0.884                 | 0.977 |



| Pairs of loci    | 31 SNP loci               |               |                       |       |
|------------------|---------------------------|---------------|-----------------------|-------|
|                  | Carpathian subpopulations |               | Alpine subpopulations |       |
|                  | Beech                     | Mixed/conifer | North                 | South |
| FG735_13&FG771_3 | 1.000                     | 0.078         | 1.000                 | 0.900 |
| FG735_13&FG771_1 | 1.000                     | 0.078         | 1.000                 | 0.905 |
| FG735_13&MS413_1 | 1.000                     | 0.180         | 1.000                 | 0.131 |
| FG691_2&FG771_1  | 1.000                     | 0.202         | 1.000                 | 0.535 |
| FG691_2&FG771_3  | 1.000                     | 0.203         | 1.000                 | 0.528 |
| FG756_2&FG894_7  | 1.000                     | 0.251         | 1.000                 | 1.000 |
| FG524_2&FG756_2  | 1.000                     | 0.281         | 1.000                 | 1.000 |
| FG487_3&FG756_2  | 1.000                     | 0.435         | 1.000                 | 1.000 |
| FG735_13&FG747_1 | 1.000                     | 0.590         | 1.000                 | 1.000 |
| MS413_2&MS428_6  | 1.000                     | 0.640         | 1.000                 | 0.004 |
| FG735_13&FG894_7 | 1.000                     | 0.677         | 1.000                 | 1.000 |
| FG894_7&MS428_6  | 1.000                     | 0.701         | 1.000                 | 1.000 |
| MS413_2&MS428_4  | 1.000                     | 1.000         | 1.000                 | 0.004 |
| FG529_4&FG788_2  | 1.000                     | 1.000         | 1.000                 | 0.736 |
| FG524_2&FG735_13 | 1.000                     | 1.000         | 1.000                 | 1.000 |
| FG524_2&MS428_4  | 1.000                     | 1.000         | 1.000                 | 1.000 |
| FG747_1&MS428_4  | 1.000                     | 1.000         | 1.000                 | 1.000 |
| FG894_7&MS428_4  | 1.000                     | 1.000         | 1.000                 | 1.000 |
| FG524_2&MS428_6  | 1.000                     | 1.000         | 1.000                 | 1.000 |

| Pairs of loci | 17 SSR loci               |               |                       |        |
|---------------|---------------------------|---------------|-----------------------|--------|
|               | Carpathian subpopulations |               | Alpine subpopulations |        |
|               | Beech                     | Mixed/conifer | North                 | South  |
| Arm02_Arm09   | 0.0000                    | 0.0000        | 0.3988                | 0.0566 |
| Arm05_Arm09   | 0.0000                    | 0.0000        | 0.4489                | 0.3990 |
| Arm02_Arm11   | 0.0000                    | 0.0000        | 0.6707                | 0.6259 |
| Arm05_Arm11   | 0.0000                    | 0.0000        | 0.0818                | 0.4250 |
| Arm09_Arm11   | 0.0000                    | 0.0000        | 0.4158                | 0.4665 |
| Arm02_Arm16   | 0.0000                    | 0.0000        | 0.4922                | 0.9839 |
| Arm05_Arm16   | 0.0000                    | 0.0000        | 0.7905                | 0.4551 |
| Arm11_Arm16   | 0.0000                    | 0.0000        | 0.6778                | 0.2328 |
| Arm16_AC31    | 0.0000                    | 0.0000        | 0.3451                | 0.0287 |
| Arm05_AC37    | 0.0000                    | 0.0000        | 0.3845                | 0.2520 |
| Arm16_AC37    | 0.0000                    | 0.0000        | 0.3720                | 0.1680 |
| AC18_AC37     | 0.0000                    | 0.0000        | 0.0375                | 0.3643 |
| AC18_AC12     | 0.0000                    | 0.0000        | 0.4232                | 0.2781 |
| Arm09_AC04    | 0.0000                    | 0.0000        | 0.5251                | 0.1181 |
| AC18_AC04     | 0.0000                    | 0.0000        | 0.5548                | 0.4329 |
| AC37_AC04     | 0.0000                    | 0.0000        | 0.8141                | 0.9861 |
| AC18_AC38     | 0.0000                    | 0.0000        | 0.7402                | 0.3675 |
| AC37_AC38     | 0.0000                    | 0.0000        | 0.0395                | 0.5887 |
| AC16_AC38     | 0.0000                    | 0.0000        | 0.0645                | 0.2517 |
| AC04_AC38     | 0.0000                    | 0.0000        | 0.0783                | 0.9784 |
| Arm05_AC22    | 0.0000                    | 0.0000        | 0.0000                | 0.8158 |
| Arm09_AC22    | 0.0000                    | 0.0000        | 0.8329                | 0.3190 |
| Arm11_AC22    | 0.0000                    | 0.0000        | 0.1145                | 0.6738 |
| Arm16_AC22    | 0.0000                    | 0.0000        | 0.9064                | 0.1990 |
| AC18_AC22     | 0.0000                    | 0.0000        | 0.7449                | 0.6143 |
| AC31_AC22     | 0.0000                    | 0.0000        | 0.3458                | 0.2754 |
| AC37_AC22     | 0.0000                    | 0.0000        | 0.4139                | 0.7720 |
| AC16_AC22     | 0.0000                    | 0.0000        | 1.0000                | 0.5677 |
| AC04_AC22     | 0.0000                    | 0.0000        | 0.1498                | 0.1824 |
| AC38_AC22     | 0.0000                    | 0.0000        | 0.6177                | 0.6581 |
| Arm16_AC12    | 0.0001                    | 0.0000        | 0.3866                | 0.7324 |
| AC37_AC16     | 0.0003                    | 0.0000        | 0.0213                | 0.4554 |
| AC12_AC22     | 0.0012                    | 0.0000        | 0.9217                | 0.0631 |
| Arm09_AC12    | 0.0014                    | 0.0000        | 0.4135                | 0.5556 |
| Arm09_Arm16   | 0.0019                    | 0.0000        | 0.2939                | 0.6921 |
| Arm09_AC37    | 0.0036                    | 0.0000        | 0.1484                | 0.8344 |
| Arm16_AC04    | 0.0054                    | 0.0000        | 0.5265                | 0.0229 |
| AC18_AC16     | 0.0082                    | 0.0000        | 0.2752                | 0.8382 |

| Pairs of loci | 17 SSR loci               |               |                       |        |
|---------------|---------------------------|---------------|-----------------------|--------|
|               | Carpathian subpopulations |               | Alpine subpopulations |        |
|               | Beech                     | Mixed/conifer | North                 | South  |
| Arm09_AC31    | 0.0208                    | 0.0000        | 0.2225                | 0.2766 |
| Arm16_AC38    | 0.0278                    | 0.0000        | 0.1954                | 0.8697 |
| AC37_AC12     | 0.0304                    | 0.0000        | 0.5634                | 0.1349 |
| Arm11_AC12    | 0.0442                    | 0.0000        | 0.4727                | 0.1518 |
| Arm16_AC16    | 0.0648                    | 0.0000        | 0.9177                | 0.9661 |
| Arm05_AC12    | 0.1013                    | 0.0000        | 0.1729                | 0.4941 |
| Arm09_AC38    | 0.1100                    | 0.0000        | 0.5268                | 0.9334 |
| Arm02_AC22    | 0.1204                    | 0.0000        | 0.9313                | 0.8346 |
| Arm05_AC31    | 0.1554                    | 0.0000        | 0.5787                | 0.6004 |
| AC04_AC34     | 0.2050                    | 0.0000        | 0.9041                | 0.6305 |
| Arm15_AC12    | 0.2184                    | 0.0000        | 0.0485                | 0.0691 |
| Arm02_AC18    | 0.3156                    | 0.0000        | 0.2230                | 0.0861 |
| AC31_AC04     | 0.3942                    | 0.0000        | 0.4529                | 0.1781 |
| Arm09_AC16    | 0.4014                    | 0.0000        | 0.1861                | 0.2257 |
| Arm16_Arm15   | 0.4573                    | 0.0000        | 0.8751                | 0.9061 |
| AC31_AC38     | 0.5747                    | 0.0000        | 0.8909                | 0.4614 |
| Arm16_AC34    | 0.4164                    | 0.0002        | 0.1308                | 0.6388 |
| Arm11_AC18    | 0.4542                    | 0.0003        | 0.1556                | 0.1070 |
| Arm02_AC38    | 0.1806                    | 0.0003        | 0.7402                | 0.4722 |
| Arm09_AC18    | 0.0000                    | 0.0014        | 0.5947                | 0.8960 |
| AC16_AC04     | 0.0000                    | 0.0078        | 0.8956                | 0.7062 |
| AC31_AC37     | 0.0000                    | 0.0181        | 0.5575                | 0.3980 |
| Arm02_Arm05   | 0.0000                    | 0.0498        | 0.6811                | 0.1581 |
| Arm16_Am111   | 0.0000                    | 0.0908        | 0.3367                | 0.3627 |
| Arm05_Am109   | 0.0003                    | 0.1036        | 0.4325                | 0.0277 |
| AC37_AC34     | 0.0000                    | 0.1082        | 0.3349                | 0.6656 |
| Arm09_AC34    | 0.0000                    | 0.1202        | 0.6757                | 0.4010 |
| Arm02_Am111   | 0.0003                    | 0.7687        | 0.4934                | 0.6466 |
| Arm11_AC38    | 0.1856                    | 0.0005        | 0.3562                | 0.8142 |
| AC31_AC12     | 0.0542                    | 0.0013        | 0.5955                | 0.3750 |
| Arm16_AC18    | 0.0934                    | 0.0015        | 0.7489                | 0.7499 |
| AC12_AC34     | 0.3335                    | 0.0026        | 0.5313                | 0.9679 |
| Arm05_AC16    | 0.0705                    | 0.0027        | 0.1633                | 0.2877 |
| Arm02_AC37    | 0.0719                    | 0.0042        | 0.9946                | 0.3939 |
| Arm05_Arm15   | 0.1708                    | 0.0043        | 0.8630                | 0.5376 |
| Arm02_Arm15   | 0.2456                    | 0.0049        | 0.7228                | 0.8375 |
| Arm02_AC04    | 0.0041                    | 0.0063        | 0.1855                | 0.7870 |
| AC31_AC16     | 0.7266                    | 0.0064        | 0.3587                | 0.5488 |
| Arm11_AC34    | 0.0843                    | 0.0077        | 0.5114                | 0.3938 |

| Pairs of loci | 17 SSR loci               |               |                       |        |
|---------------|---------------------------|---------------|-----------------------|--------|
|               | Carpathian subpopulations |               | Alpine subpopulations |        |
|               | Beech                     | Mixed/conifer | North                 | South  |
| Arm05_AC38    | 0.1434                    | 0.0084        | 0.1036                | 0.6838 |
| Arm11_AC31    | 0.7607                    | 0.0093        | 0.9610                | 0.1331 |
| Arm09_Am109   | 0.0595                    | 0.0106        | 0.9876                | 0.9284 |
| Arm11_Am109   | 0.1394                    | 0.0109        | 0.3426                | 0.4001 |
| AC12_AC04     | 0.0036                    | 0.0119        | 0.4568                | 0.6461 |
| Arm15_AC22    | 0.0998                    | 0.0127        | 0.4629                | 0.5113 |
| AC18_AC31     | 0.7867                    | 0.0135        | 0.8441                | 0.5184 |
| AC12_AC38     | 0.0126                    | 0.0165        | 0.2310                | 0.9742 |
| AC12_AC16     | 0.0573                    | 0.0169        | 0.9693                | 0.1852 |
| Arm05_Am111   | 0.2269                    | 0.0205        | 0.0976                | 0.2774 |
| Arm05_AC04    | 0.0068                    | 0.0218        | 0.4168                | 0.4809 |
| AC38_AC34     | 0.0635                    | 0.0238        | 0.9858                | 0.9066 |
| Arm11_AC04    | 0.1111                    | 0.0241        | 0.6833                | 0.1973 |
| Arm02_AC16    | 0.8822                    | 0.0247        | 0.1738                | 0.9638 |
| AC16_AC34     | 0.0236                    | 0.0276        | 0.4823                | 0.4441 |
| Arm11_AC16    | 0.2701                    | 0.0297        | 0.0606                | 0.6946 |
| Arm15_AC37    | 0.4804                    | 0.0348        | 0.6325                | 0.7978 |
| Arm11_Arm15   | 0.1719                    | 0.0455        | 0.8881                | 0.7374 |
| Arm15_AC16    | 0.6329                    | 0.0519        | 0.8097                | 0.9986 |
| Arm11_AC37    | 0.0388                    | 0.0538        | 0.9244                | 0.8812 |
| Arm15_AC18    | 0.2994                    | 0.0554        | 0.3914                | 0.3547 |
| AC22_AC34     | 0.0313                    | 0.0737        | 0.1264                | 0.3283 |
| Am111_AC12    | 0.0240                    | 0.0875        | 0.9414                | 0.0113 |
| Am111_AC37    | 0.1032                    | 0.0904        | 0.8024                | 0.4015 |
| Am109_AC18    | 0.0121                    | 0.0927        | 0.2414                | 0.1891 |
| Arm09_Am111   | 0.0117                    | 0.1030        | 0.2342                | 0.6775 |
| Am109_AC22    | 0.5859                    | 0.1221        | 0.2869                | 0.2112 |
| AC31_AC34     | 0.4638                    | 0.1264        | 0.3654                | 0.7305 |
| Arm02_AC34    | 0.3948                    | 0.1549        | 0.6448                | 0.5299 |
| Arm05_AC18    | 0.0014                    | 0.1663        | 0.3799                | 0.3030 |
| Arm02_AC12    | 0.5396                    | 0.1730        | 0.8675                | 0.2711 |
| AC18_AC34     | 0.1427                    | 0.2007        | 0.9700                | 0.7546 |
| Am111_AC31    | 0.7924                    | 0.2188        | 0.1619                | 0.9599 |
| Am111_AC18    | 0.2896                    | 0.2507        | 0.7209                | 0.5238 |
| Arm15_AC38    | 0.5880                    | 0.2642        | 0.9142                | 0.7801 |
| Am109_AC38    | 0.2619                    | 0.2650        | 1.0000                | 0.0275 |
| Arm02_AC31    | 0.7231                    | 0.2807        | 0.4770                | 0.2807 |
| Arm02_Am109   | 0.2558                    | 0.2883        | 0.3509                | 0.2090 |
| Am111_AC04    | 0.0248                    | 0.2919        | 0.9705                | 0.3723 |
| Am109_AC12    | 0.0784                    | 0.3087        | 0.5840                | 0.5495 |

| Pairs of loci | 17 SSR loci               |               |                       |        |
|---------------|---------------------------|---------------|-----------------------|--------|
|               | Carpathian subpopulations |               | Alpine subpopulations |        |
|               | Beech                     | Mixed/conifer | North                 | South  |
| Am109_AC31    | 0.2209                    | 0.3101        | 0.2105                | 0.1085 |
| Arm15_AC31    | 0.0058                    | 0.3291        | 0.1490                | 0.7347 |
| Am111_AC16    | 0.8609                    | 0.3298        | 0.8197                | 0.7423 |
| Arm15_Am111   | 0.0051                    | 0.3504        | 1.0000                | 0.8399 |
| Arm05_AC34    | 0.2108                    | 0.3909        | 0.7495                | 0.7638 |
| Am111_AC38    | 0.0580                    | 0.4631        | 0.2992                | 0.5796 |
| Am109_AC37    | 0.5128                    | 0.5015        | 0.1692                | 0.3178 |
| Am111_AC34    | 0.4028                    | 0.5887        | 0.6328                | 0.4936 |
| Arm16_Am109   | 0.0711                    | 0.6167        | 0.5538                | 0.7656 |
| Am111_AC22    | 0.1541                    | 0.6273        | 0.5536                | 0.5393 |
| Arm11_Am111   | 0.6808                    | 0.7095        | 0.6357                | 0.4515 |
| Arm09_Arm15   | 0.0010                    | 0.7276        | 0.1611                | 0.1535 |
| Am109_AC04    | 0.3046                    | 0.8572        | 0.1370                | 0.8045 |
| Arm15_AC04    | 0.2863                    | 0.8740        | 0.0742                | 0.1066 |
| Am109_AC34    | 0.3189                    | 0.8958        | 0.1047                | 0.6285 |
| Arm15_Am109   | 0.0280                    | 1.0000        | 0.3208                | 0.5802 |
| Am109_AC16    | 0.2328                    | 1.0000        | 0.2935                | 0.9899 |
| Am109_Am111   | 0.8403                    | 1.0000        | 0.5744                | 0.3341 |
| Arm15_AC34    | 1.0000                    | 1.0000        | 0.9064                | 0.0896 |
