# Supplementary material
Source: PubMed Central journal article supplement (PMC5637368)

Figures S3.1- S3.6 Graphical representation of the detected  $F_{ST}$  outlier loci (loci being under natural selection) assuming different hierarchical models for two *Armillaria cepistipes* populations:  
 A – ARLEQUIN and B – BAYESCAN.

**Figure S3.1 Loci: 17 SSRs**  
**Populations: 1- Carpathian; 2- Alpine**

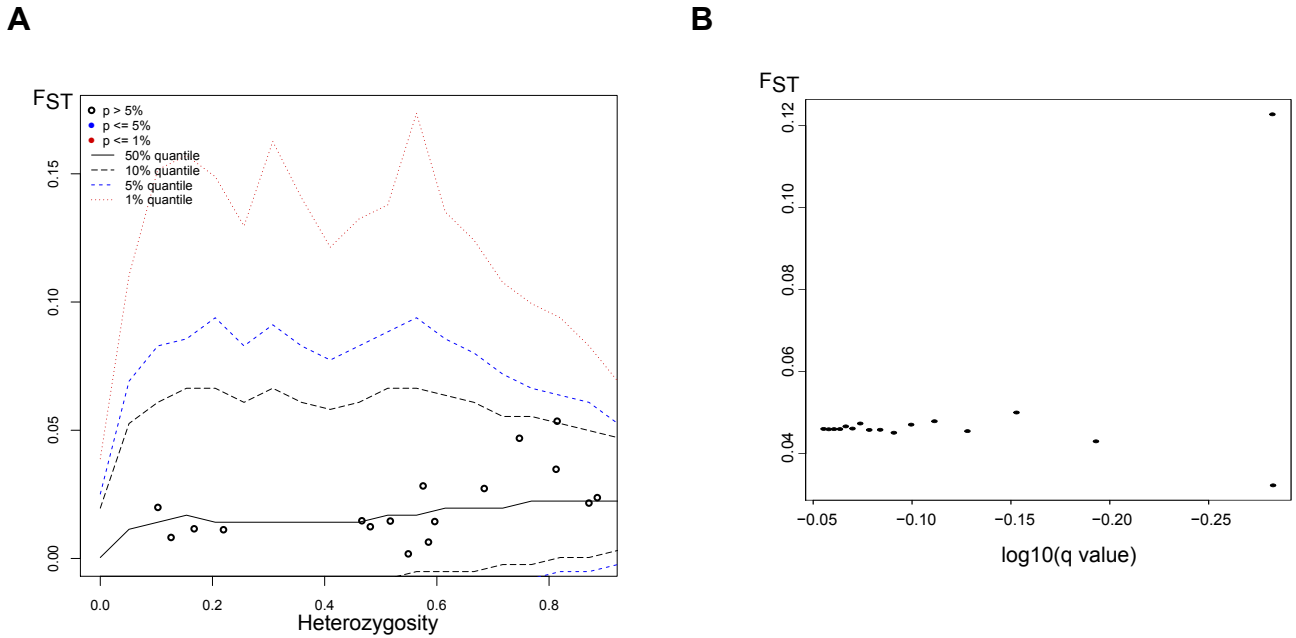

**Figure S3.2 Loci: 24 SNPs**  
**Populations: 1- Carpathian; 2- Alpine**

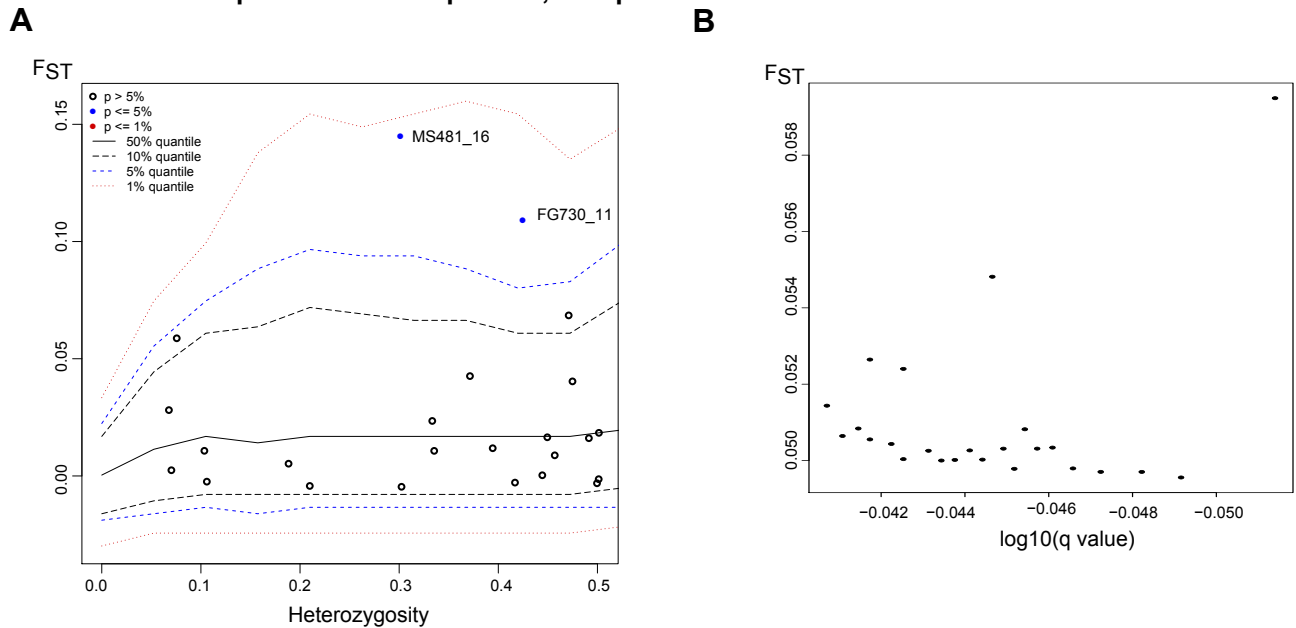

**Figure S3.3 Loci: 17 SSRs**  
**Carpathian population with two subpopulations: 1- Beech; 2- Mixed/conifer**

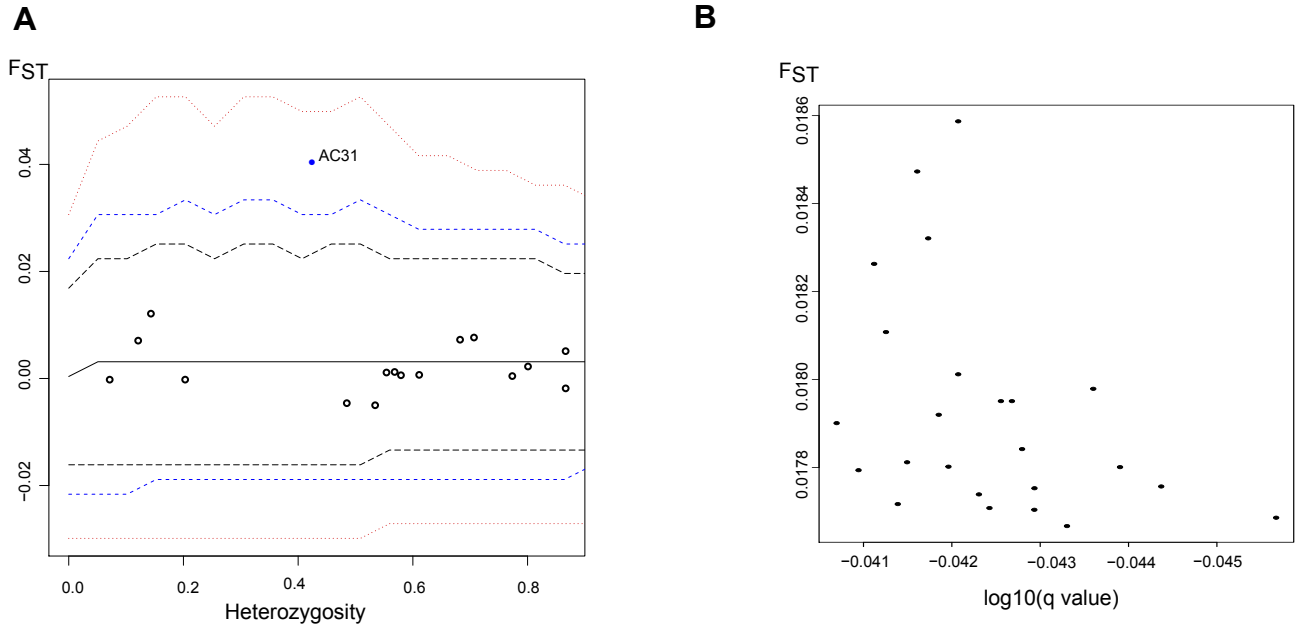

**Figure S3.4 Loci: 17 SSRs**  
**Alpine population with two subpopulations: 1- North; 2- South**

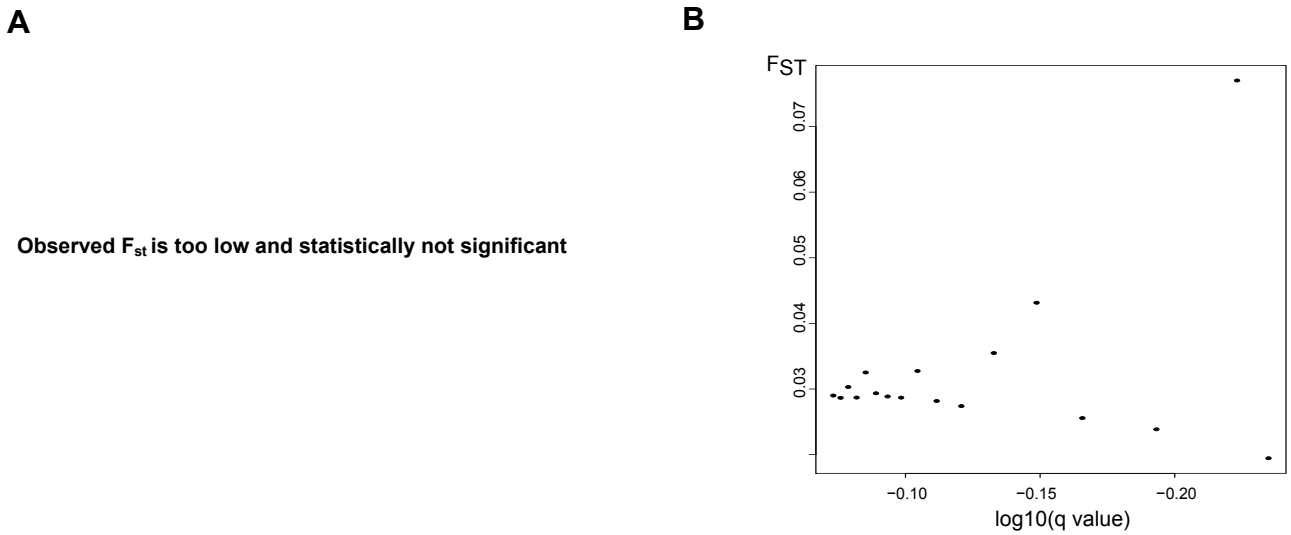

**Figure S3.5 Loci: 24 SNPs**  
**Carpathian population with two subpopulations: 1- Beech; 2- Mixed/conifer**

**A**

Observed  $F_{st}$  is too low and statistically not significant

**B**

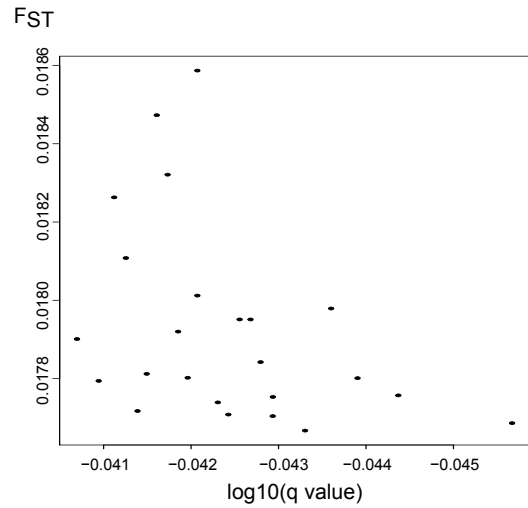

**Figure S3.6 Loci: 24 SNPs**  
**Alpine population with two subpopulations: 1- North; 2- South**

**A**

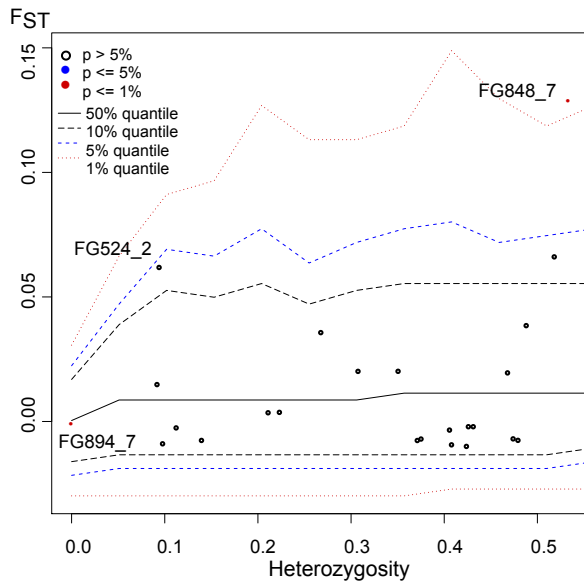

**B**

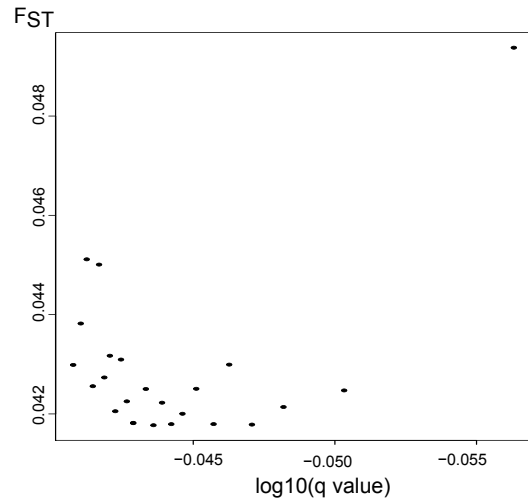

Supplement: hdy201748x3.pdf [file hdy201748x3.pdf]
