# Supplementary material
Source: PubMed Central journal article supplement (PMC5637368)

**Figure S4.2 Loci: 24 SNPs**

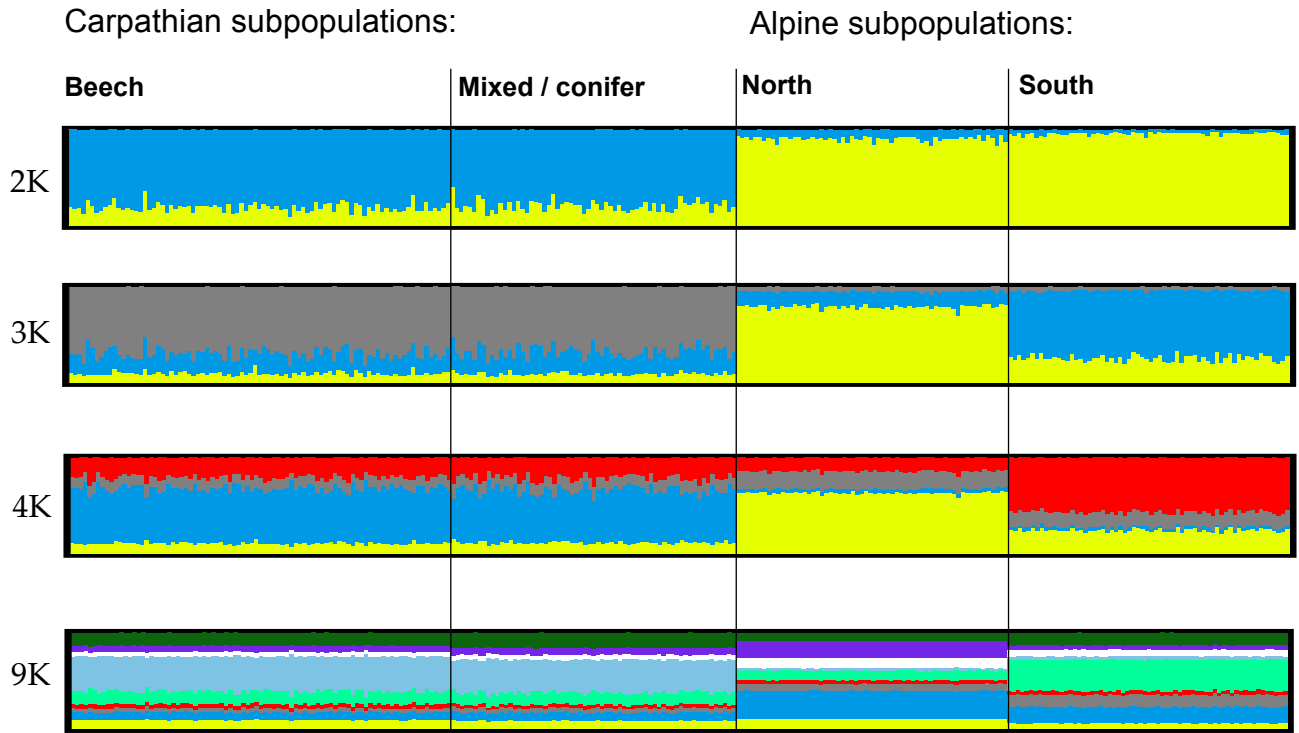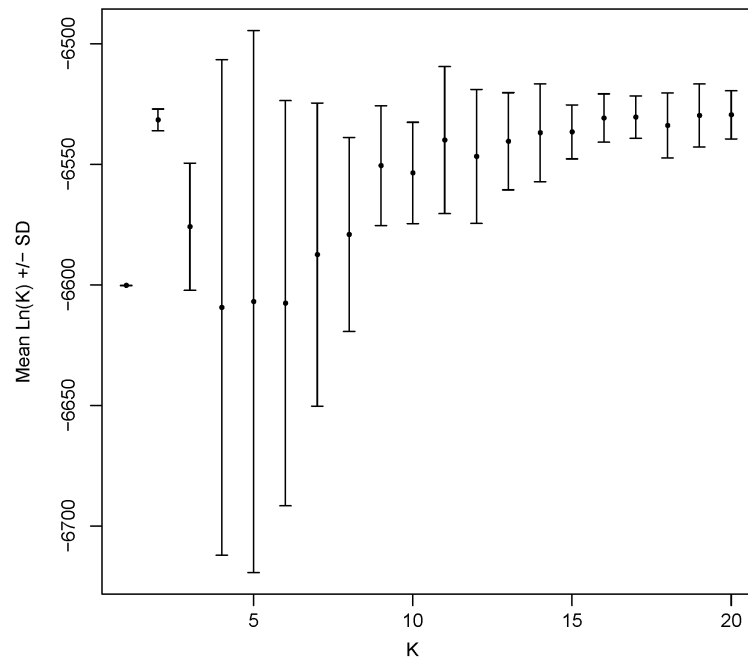

Figure S4.3 Loci: 19 SNPs (excluded 5 loci presumably under natural selection pressure)

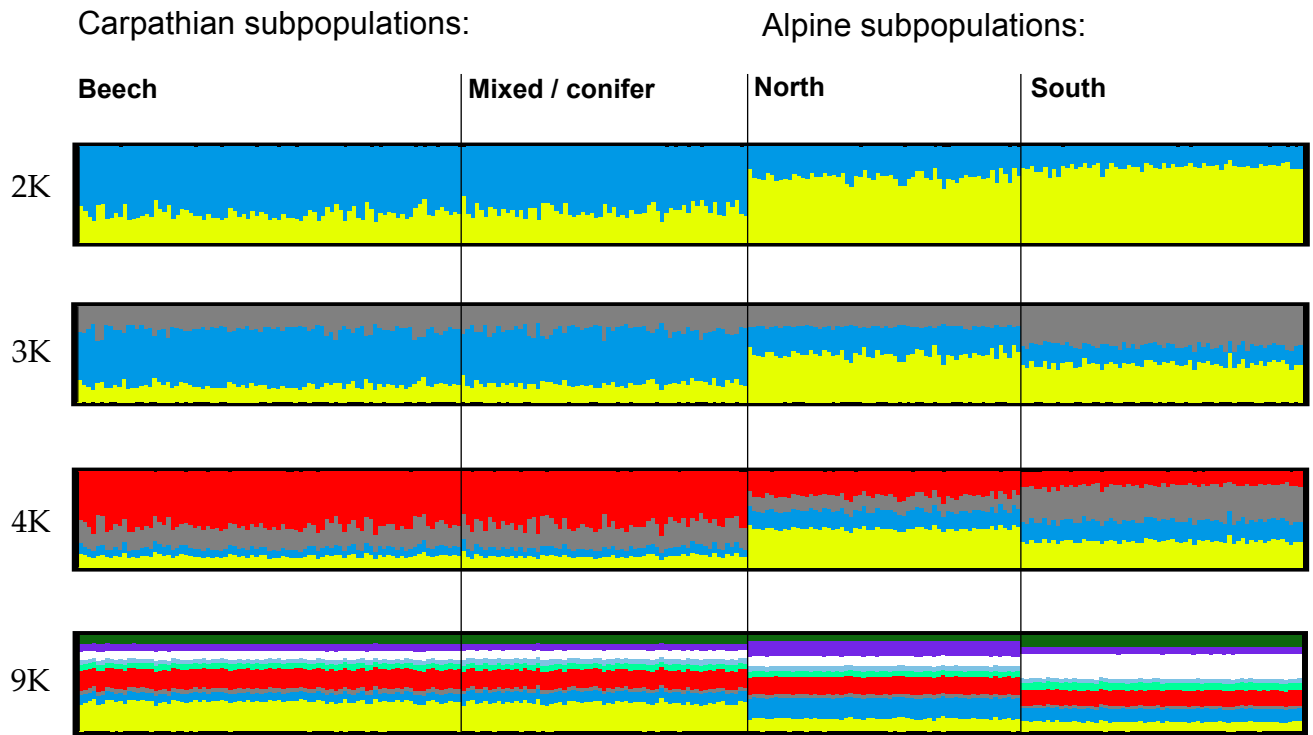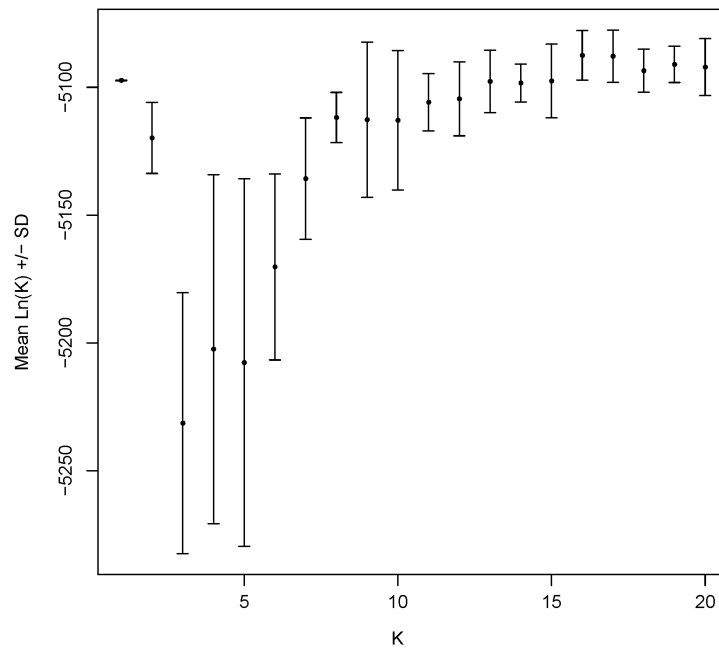

**Figure S4.4 Loci: 24 SNP loci**

Alpine subpopulations:

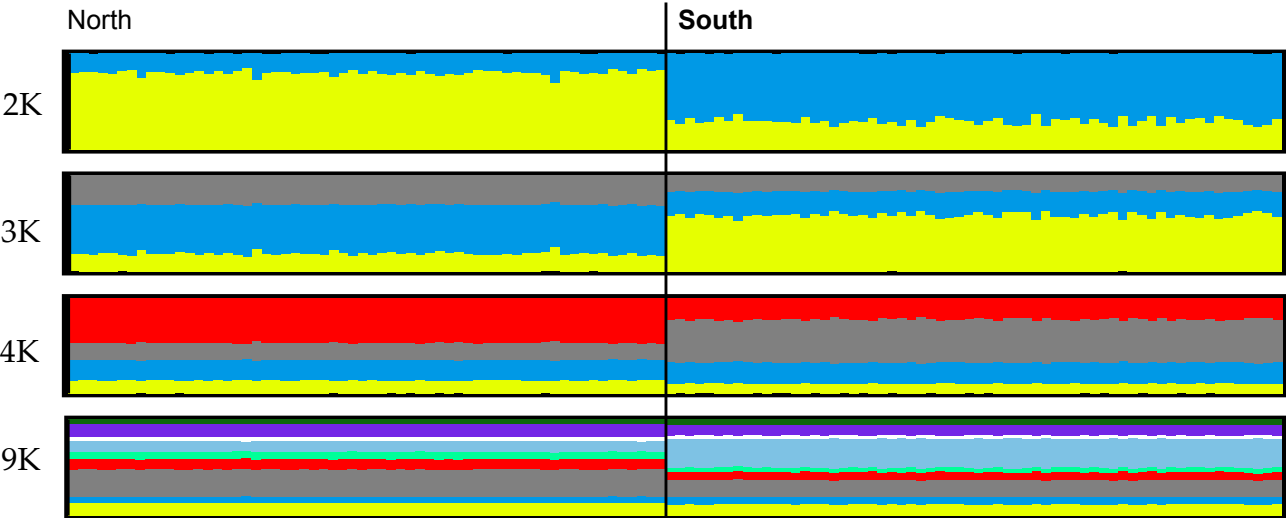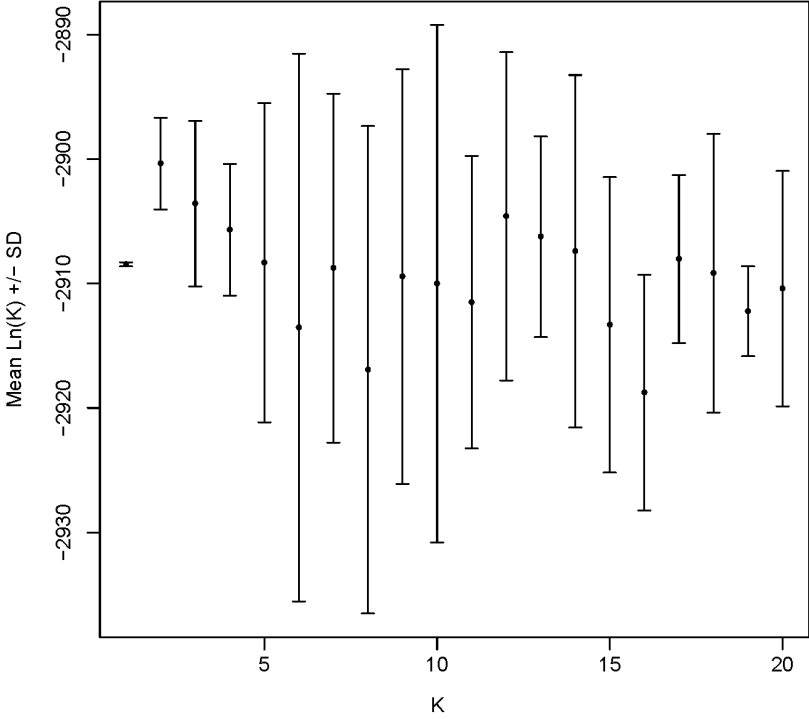

Supplement: hdy201748x4.pdf [file hdy201748x4.pdf]
